# Supplementary material
Source: MDPI journal article supplement (https://www.mdpi.com/2073-4352/14/3/256)
Supplement: s1 [file s1]

# Synthesis and Structure of unsymmetrical anthracenyl-isoxazole antitumor agents via the diastereoselective bromination of 3-(9'-anthryl)-isoxazole esters

Michael J. Campbell,<sup>1,4</sup> Daniel A. Decato,<sup>1</sup> Chun Li,<sup>2</sup> Matthew J. Weaver,<sup>1,3</sup> and Nicholas Natale<sup>\*,1</sup>

<sup>1</sup> Medicinal Chemistry Graduate Program, University of Montana, Missoula MT 59812

<sup>2</sup> Department of Chemistry, Ithaca College, 953 Danby Road, Ithaca NY 14850

<sup>3</sup> Advanced Material Solutions, 2920 S Garfield Street, Missoula, MT 59801.

[weaver@silicongases.com](mailto:weaver@silicongases.com)

<sup>4</sup>current address: OSRX Pharmaceuticals, Missoula, MT 59801

\* Corresponding author [nicholas.natale@umontana.edu](mailto:nicholas.natale@umontana.edu)

## Supplementary Material

### Table of Contents

|                                                                                                                                                                                              |      |
|----------------------------------------------------------------------------------------------------------------------------------------------------------------------------------------------|------|
| <b>Figure S1.</b> Proton NMR of the A ring region for tetrabromo nitrile oxide intermediate, <b>6</b> .....                                                                                  | iii  |
| <b>Figure S2.</b> Larger version of Figure 5, Structure of Bromo nitrile oxide <b>1</b> (MC59).....                                                                                          | iv   |
| <b>Figure S3.</b> Larger version of Figure 6. Unit cell for the Bromo nitrile oxide <b>1</b> (MC59).....                                                                                     | iv   |
| <b>Figure S4.</b> Larger version of Figure 7, Halogen Bond for Bromo nitrile oxide <b>1</b> (MC59), with a distance of 3.057 Å.....                                                          | v    |
| <b>Table S1</b> Fractional atomic coordinates and isotropic or equivalent isotropic displacement parameters (Å <sup>2</sup> ) for Bromo Nitrile Oxide <b>1</b> , MC59.....                   | v    |
| <b>Table S2.</b> Atomic displacement parameters (Å <sup>2</sup> ) for Bromo Nitrile Oxide <b>1</b> , MC-59.....                                                                              | vi   |
| <b>Table S3.</b> Geometric parameters (Å, °) for (mc59) for Bromo Nitrile Oxide <b>1</b> , MC-59.....                                                                                        | vi   |
| <b>Figure S5.</b> Proton NMR of penta bromo AIM ester <b>2</b> (MC79).....                                                                                                                   | viii |
| <b>Figure S6.</b> <sup>13</sup> C NMR of penta bromo ester <b>2</b> (MC79).....                                                                                                              | ix   |
| <b>Figure S7.</b> Numbering of unit cell of penta bromo ester <b>2</b> (cl_mc79c9_15_0m).....                                                                                                | x    |
| <b>Table S4.</b> Fractional atomic coordinates and isotropic or equivalent isotropic displacement parameters (Å <sup>2</sup> ) for the Penta bromo AIM ester <b>2</b> (cl_mc79c9_15_0m)..... | x    |
| <b>Table S5.</b> Atomic displacement parameters (Å <sup>2</sup> ) for the Penta bromo AIM ester <b>2</b> (cl_mc79c9_15_0m).....                                                              | xv   |

|                                                                                                                                                                                                                |         |
|----------------------------------------------------------------------------------------------------------------------------------------------------------------------------------------------------------------|---------|
| <b>Table S6.</b> Geometric parameters ( $\text{\AA}$ , $^\circ$ ) for the Penta bromo AIM ester <b>2</b><br>(cl_mc79c9_15_0m).....                                                                             | xxxi    |
| <b>Table S7.</b> Hydrogen-bond geometry ( $\text{\AA}$ , $^\circ$ ) for the Penta bromo AIM ester<br><b>2</b> (cl_mc79c9_15_0m).....                                                                           | xxxii   |
| <b>Figure S8.</b> Numbering for the unit cell for tetra bromo chloro AIM <b>3</b><br>(MC221).....                                                                                                              | xxxii   |
| <b>Table S8.</b> Fractional Atomic Coordinates ( $\times 10^4$ ) and Equivalent Isotropic Displacement<br>Parameters ( $\text{\AA}^2 \times 10^3$ ) for the Tetrabromo Chloro AIM ester <b>3</b> (MC221). .... | xxxiii  |
| <b>Table S9.</b> Anisotropic Displacement Parameters ( $\text{\AA}^2 \times 10^3$ ) for the Tetrabromo Chloro AIM ester<br><b>3</b> (MC221).....                                                               | xxxv    |
| <b>Table S10.</b> Bond Lengths for the Tetrabromo Chloro AIM ester <b>3</b> (MC221).....                                                                                                                       | xxxvi   |
| <b>Table S11.</b> Bond Angles for the Tetrabromo Chloro AIM ester <b>3</b> (MC221).....                                                                                                                        | xxxviii |
| <b>Table S12.</b> Torsion Angles for the Tetrabromo Chloro AIM ester <b>3</b> (MC221).....                                                                                                                     |         |
| <b>Table S13.</b> Hydrogen Atom Coordinates ( $\text{\AA} \times 10^4$ ) and Isotropic Displacement Parameters<br>( $\text{\AA}^2 \times 10^3$ ) for the Tetrabromo Chloro AIM ester <b>3</b> (MC221).....     | xxxviii |
| <b>Table S14.</b> Atomic Occupancy for the Tetrabromo Chloro AIM ester <b>3</b> (MC221).....                                                                                                                   | xxxix   |
| <b>Figure S9.</b> Numbering for dibromo ester <b>4</b> (MC219), umt-nn3.....                                                                                                                                   | xl      |
| <b>Table S15.</b> Atom Coordinates ( $\text{\AA} \times 10^4$ ) for bibromo ester <b>4</b> (MC219), umt-nn3.....                                                                                               | xl      |
| <b>Table S16.</b> Anisotropic Displacement Parameters ( $\text{\AA}^2 \times 10^3$ ) for dibromo ester <b>4</b> , (MC219), umt-<br>nn3.....                                                                    | xli     |
| <b>Table S17.</b> Bond Lengths for bibromo ester <b>4</b> , (MC219), umt-nn3.....                                                                                                                              | xlii    |
| <b>Table S18.</b> Bond Angles for dibromo ester <b>4</b> , (MC219), umt-nn3.....                                                                                                                               | xliii   |
| <b>Table S19.</b> Torsions for dibromo ester <b>4</b> , (MC219), umt-nn3.....                                                                                                                                  | xliii   |
| <b>Table S20.</b> Hydrogen Atom Coordinates ( $\text{\AA} \times 10^4$ ) and Isotropic Displacement Parameters<br>( $\text{\AA}^2 \times 10^3$ ) for dibromo ester <b>4</b> , (MC219), umt-nn3.....            | xliv    |
| <b>Figure S10.</b> HPLC-MS for dibromo ester <b>4</b> .....                                                                                                                                                    | xlv     |

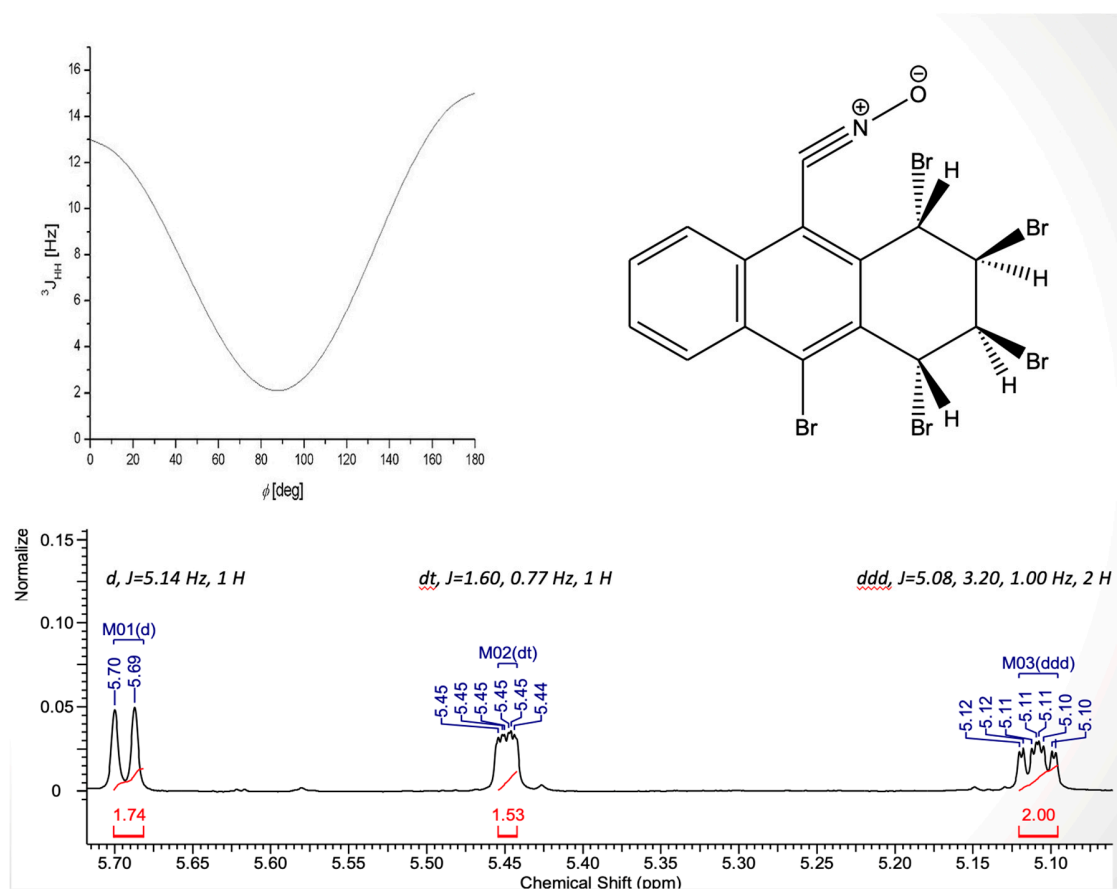

**Figure S1.** Proton NMR of the A ring region for tetrabromo nitrile oxide intermediate, **6**. The stereochemistry was assigned by analogy to the report of Cakmak 2006 [20], using the Karplus equation.

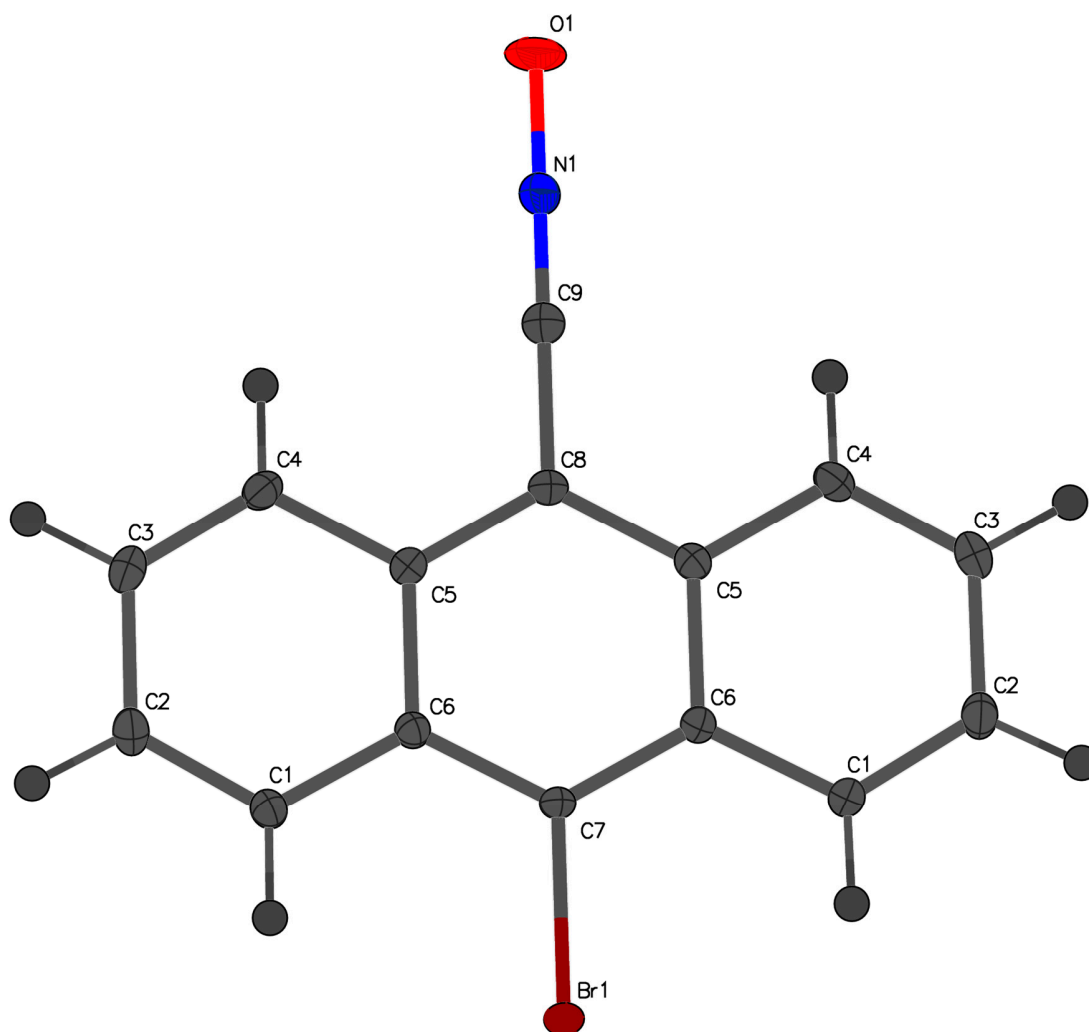

**Figure S2.** Larger version of Figure 5, Structure of Bromo nitrile oxide **1** (MC59).

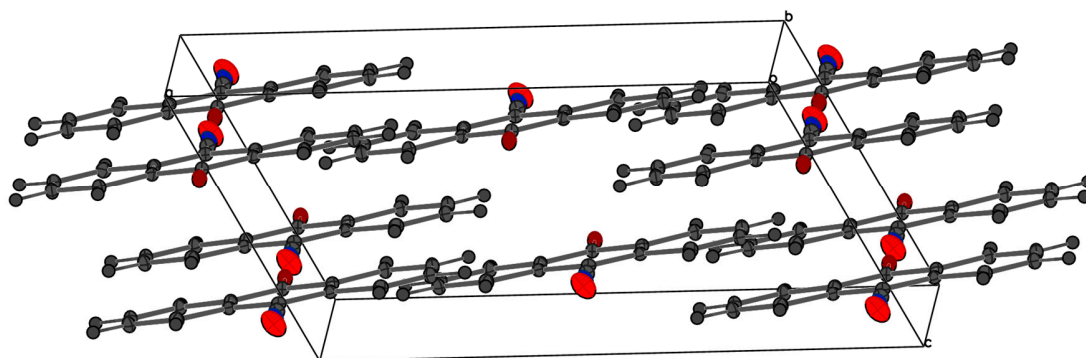

**Figure S3.** Larger version of Figure 6. Unit cell for the Bromo nitrile oxide **1** (MC59).

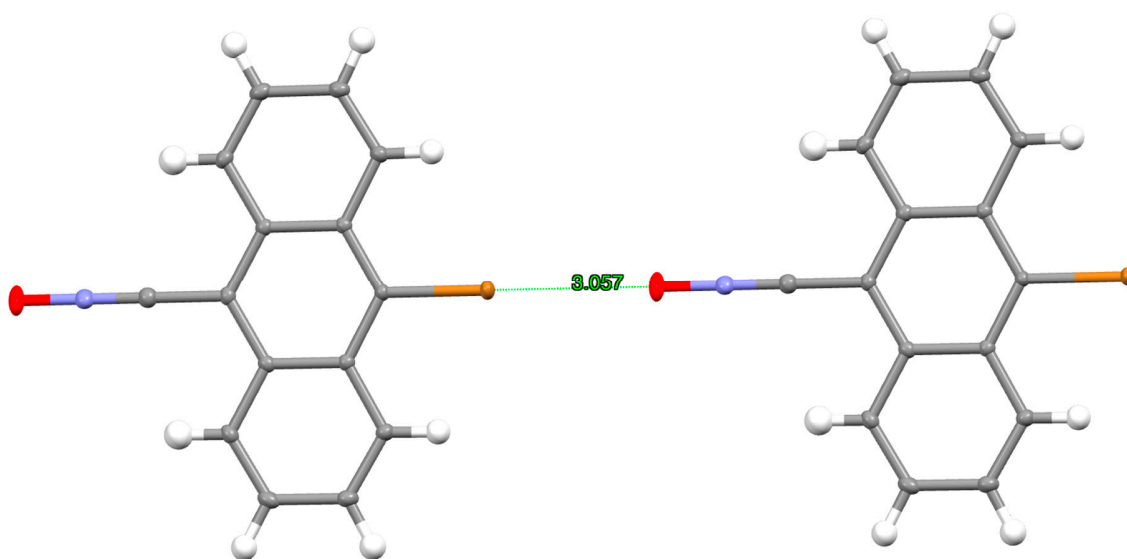

**Figure S4.** Larger version of Figure 7, halogen bond for Bromo nitrile oxide **1** (MC59), with a distance of 3.057 Å

Tables of Fractional atomic coordinates and isotropic or equivalent isotropic displacement parameters ( $\text{\AA}^2$ ), Atomic displacement parameters ( $\text{\AA}^2$ ), Geometric parameters ( $\text{\AA}$ ,  $^\circ$ ), and Hydrogen-bond geometry ( $\text{\AA}$ ,  $^\circ$ ) for the Bromo nitrile oxide **1** (MC59) **Tables S1-S3**; Penta Bromo AIM **2** (cl\_mc79c9\_15\_0m), **Tables S4-S7**; the tetra bromo Chloro AIM ester **3** (**Tables S8-S14**); Dibromo AIM ester **4** (MC219), **Tables S15- S20** are listed below.

**Table S1.** Fractional atomic coordinates and isotropic or equivalent isotropic displacement parameters ( $\text{\AA}^2$ ) for Bromo Nitrile Oxide **1**, MC-59.

|     | <i>x</i>    | <i>y</i>     | <i>z</i>     | $U_{\text{iso}}^*/U_{\text{eq}}$ |
|-----|-------------|--------------|--------------|----------------------------------|
| Br1 | 0.500000    | 0.76165 (2)  | 0.250000     | 0.01336 (6)                      |
| C3  | 0.31470 (8) | 0.59743 (10) | 0.12446 (15) | 0.01277 (19)                     |
| N1  | 0.500000    | 0.13259 (14) | 0.250000     | 0.0161 (3)                       |
| C4  | 0.22844 (8) | 0.53668 (11) | 0.06309 (15) | 0.0146 (2)                       |
| C8  | 0.500000    | 0.35618 (14) | 0.250000     | 0.0110 (3)                       |
| C2  | 0.40865 (8) | 0.53946 (10) | 0.18675 (13) | 0.01031 (18)                     |
| C9  | 0.500000    | 0.23122 (14) | 0.250000     | 0.0145 (3)                       |
| C7  | 0.40939 (8) | 0.41515 (10) | 0.18517 (14) | 0.01059 (18)                     |

|    |             |              |              |              |
|----|-------------|--------------|--------------|--------------|
| C6 | 0.31801 (8) | 0.35509 (10) | 0.11857 (15) | 0.01308 (19) |
| C5 | 0.23030 (8) | 0.41389 (11) | 0.05857 (15) | 0.0146 (2)   |
| O1 | 0.500000    | 0.02625 (12) | 0.250000     | 0.0279 (3)   |
| C1 | 0.500000    | 0.59723 (13) | 0.250000     | 0.0102 (2)   |
| H3 | 0.3122 (13) | 0.6794 (17)  | 0.131 (2)    | 0.021 (4)*   |
| H4 | 0.1638 (15) | 0.5742 (17)  | 0.021 (3)    | 0.024 (4)*   |
| H6 | 0.3189 (19) | 0.2753 (19)  | 0.118 (3)    | 0.029 (6)*   |
| H5 | 0.1680 (14) | 0.3740 (18)  | 0.013 (2)    | 0.023 (4)*   |

**Table S2.** Atomic displacement parameters ( $\text{\AA}^2$ ) for Bromo Nitrile Oxide **1**, MC-59.

|     | $U^{11}$    | $U^{22}$    | $U^{33}$    | $U^{12}$    | $U^{13}$     | $U^{23}$    |
|-----|-------------|-------------|-------------|-------------|--------------|-------------|
| Br1 | 0.01424 (9) | 0.00805 (8) | 0.01758 (9) | 0.000       | -0.00251 (6) | 0.000       |
| C3  | 0.0111 (4)  | 0.0123 (5)  | 0.0147 (5)  | 0.0005 (3)  | -0.0011 (3)  | 0.0012 (4)  |
| N1  | 0.0120 (6)  | 0.0137 (6)  | 0.0225 (7)  | 0.000       | 0.0011 (5)   | 0.000       |
| C4  | 0.0109 (4)  | 0.0173 (5)  | 0.0155 (5)  | 0.0001 (4)  | -0.0017 (4)  | 0.0010 (4)  |
| C8  | 0.0122 (6)  | 0.0096 (6)  | 0.0113 (6)  | 0.000       | 0.0010 (5)   | 0.000       |
| C2  | 0.0101 (4)  | 0.0104 (4)  | 0.0105 (4)  | 0.0001 (3)  | 0.0000 (3)   | 0.0003 (3)  |
| C9  | 0.0143 (7)  | 0.0136 (7)  | 0.0158 (7)  | 0.000       | 0.0003 (6)   | 0.000       |
| C7  | 0.0107 (4)  | 0.0109 (4)  | 0.0102 (4)  | -0.0009 (3) | 0.0003 (3)   | -0.0002 (3) |
| C6  | 0.0129 (4)  | 0.0119 (5)  | 0.0144 (5)  | -0.0024 (3) | 0.0003 (4)   | -0.0015 (4) |
| C5  | 0.0113 (4)  | 0.0175 (5)  | 0.0150 (5)  | -0.0030 (4) | -0.0006 (4)  | -0.0014 (4) |
| O1  | 0.0256 (6)  | 0.0083 (5)  | 0.0503 (9)  | 0.000       | 0.0062 (6)   | 0.000       |
| C1  | 0.0107 (6)  | 0.0082 (6)  | 0.0116 (6)  | 0.000       | -0.0006 (5)  | 0.000       |

**Table S3.** Geometric parameters ( $\text{\AA}$ ,  $^\circ$ ) for (mc59) for Bromo Nitrile Oxide **1**, MC-59.

|        |             |                    |             |
|--------|-------------|--------------------|-------------|
| Br1—C1 | 1.8993 (15) | C8—C7              | 1.4068 (13) |
| C3—C4  | 1.3651 (15) | C8—C7 <sup>i</sup> | 1.4068 (13) |
| C3—C2  | 1.4303 (15) | C2—C7              | 1.4360 (16) |
| C3—H3  | 0.95 (2)    | C2—C1              | 1.4042 (12) |
| N1—C9  | 1.139 (2)   | C7—C6              | 1.4249 (14) |
| N1—O1  | 1.228 (2)   | C6—C5              | 1.3654 (16) |
| C4—C5  | 1.4190 (17) | C6—H6              | 0.92 (2)    |

|                          |             |                           |             |
|--------------------------|-------------|---------------------------|-------------|
| C4—H4                    | 0.970 (19)  | C5—H5                     | 0.967 (18)  |
| C8—C9                    | 1.443 (2)   |                           |             |
|                          |             |                           |             |
| C4—C3—C2                 | 121.13 (11) | N1—C9—C8                  | 180.0       |
| C4—C3—H3                 | 120.1 (11)  | C8—C7—C2                  | 119.14 (10) |
| C2—C3—H3                 | 118.7 (11)  | C8—C7—C6                  | 121.91 (11) |
| C9—N1—O1                 | 180.0       | C6—C7—C2                  | 118.95 (10) |
| C3—C4—C5                 | 120.52 (10) | C7—C6—H6                  | 118.5 (15)  |
| C3—C4—H4                 | 122.5 (12)  | C5—C6—C7                  | 121.02 (11) |
| C5—C4—H4                 | 116.9 (11)  | C5—C6—H6                  | 120.5 (15)  |
| C7—C8—C9                 | 118.96 (7)  | C4—C5—H5                  | 118.0 (12)  |
| C7 <sup>i</sup> —C8—C9   | 118.96 (7)  | C6—C5—C4                  | 120.24 (10) |
| C7 <sup>i</sup> —C8—C7   | 122.08 (14) | C6—C5—H5                  | 121.7 (12)  |
| C3—C2—C7                 | 118.12 (9)  | C2—C1—Br1                 | 118.37 (7)  |
| C1—C2—C3                 | 123.70 (10) | C2 <sup>i</sup> —C1—Br1   | 118.38 (7)  |
| C1—C2—C7                 | 118.18 (10) | C2 <sup>i</sup> —C1—C2    | 123.25 (14) |
|                          |             |                           |             |
| C3—C4—C5—C6              | 1.11 (17)   | C9—C8—C7—C2               | 179.33 (6)  |
| C3—C2—C7—C8              | -178.44 (8) | C9—C8—C7—C6               | -0.40 (11)  |
| C3—C2—C7—C6              | 1.30 (15)   | C7 <sup>i</sup> —C8—C7—C2 | -0.67 (6)   |
| C3—C2—C1—Br1             | -0.92 (11)  | C7 <sup>i</sup> —C8—C7—C6 | 179.60 (11) |
| C3—C2—C1—C2 <sup>i</sup> | 179.08 (11) | C7—C2—C1—Br1              | 179.34 (6)  |
| C4—C3—C2—C7              | -0.77 (16)  | C7—C2—C1—C2 <sup>i</sup>  | -0.66 (6)   |
| C4—C3—C2—C1              | 179.49 (9)  | C7—C6—C5—C4               | -0.55 (16)  |
| C8—C7—C6—C5              | 179.07 (9)  | C1—C2—C7—C8               | 1.31 (13)   |
| C2—C3—C4—C5              | -0.42 (17)  | C1—C2—C7—C6               | -178.95 (8) |
| C2—C7—C6—C5              | -0.66 (15)  |                           |             |

Symmetry code: (i)  $-x+1, y, -z+1/2$ .

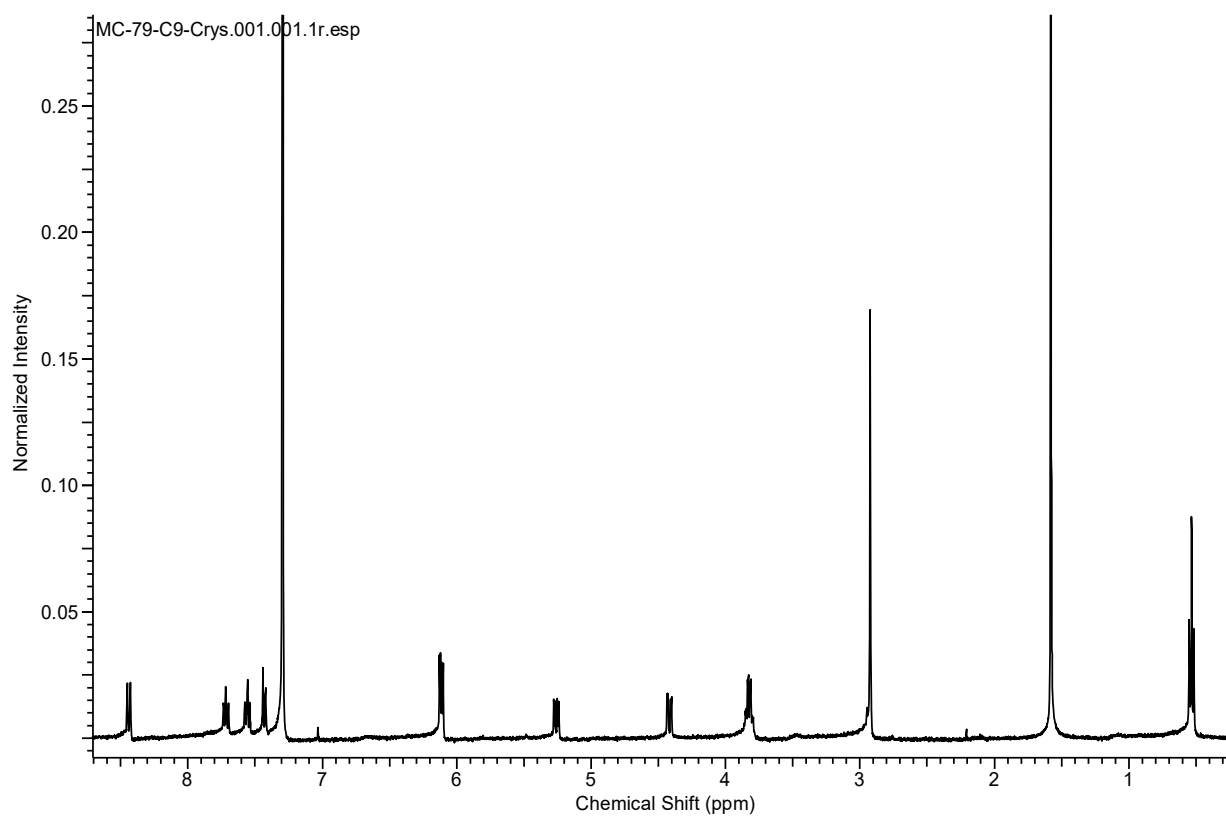

**Figure S5.** Proton NMR of Penta bromo AIM ester **2** (MC79).

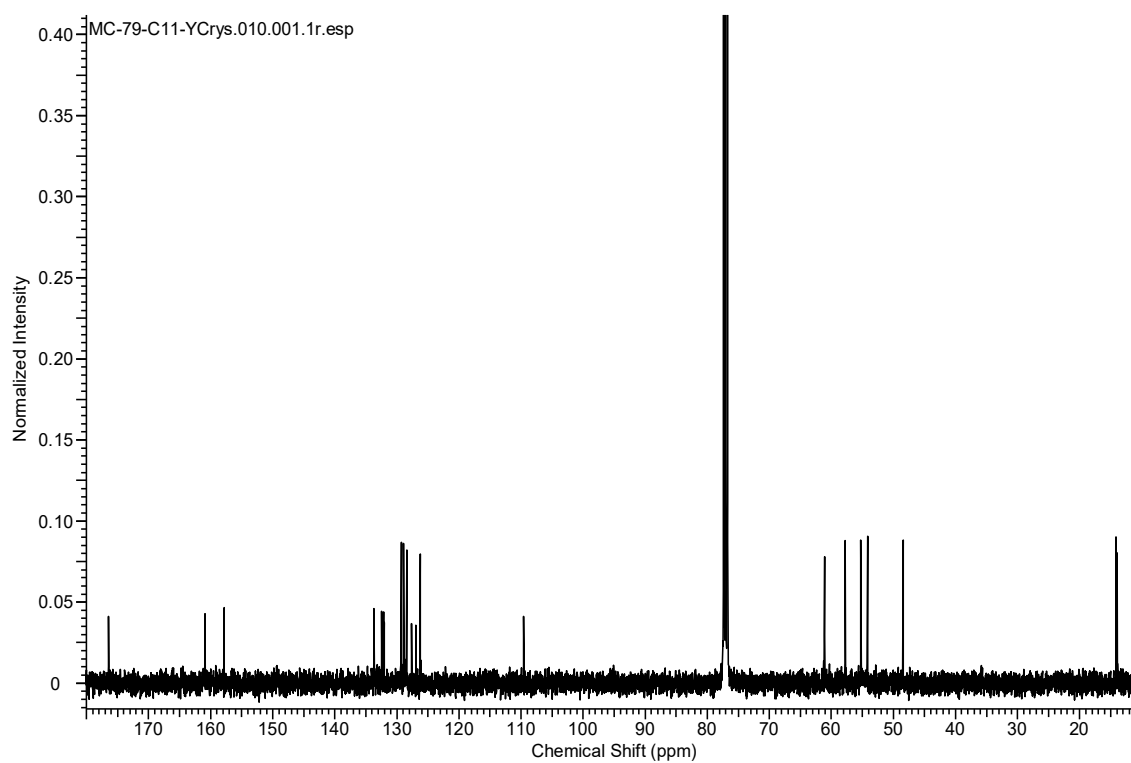

**Figure S6.**  $^{13}\text{C}$  NMR of penta bromo ester 2 (MC79)

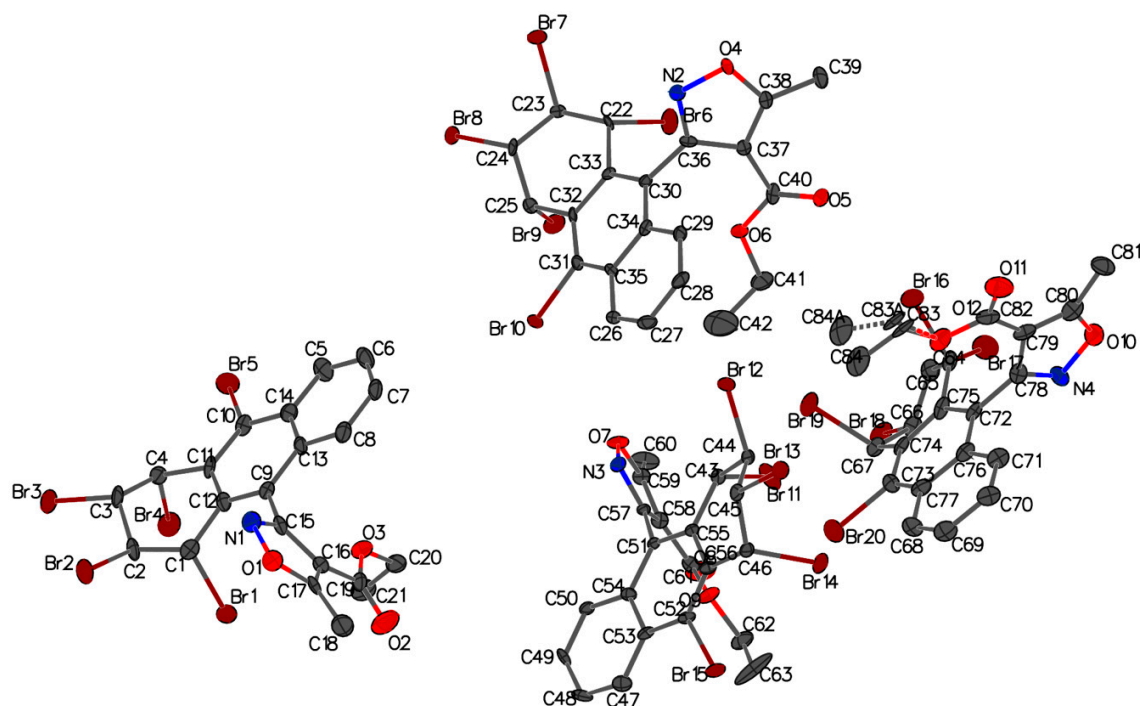

**Figure S7.** Numbering of unit cell of penta bromo ester **2** (cl\_mc79c9\_15\_0m).

**Table S4.** Fractional atomic coordinates and isotropic or equivalent isotropic displacement parameters ( $\text{\AA}^2$ ) for the Penta bromo AIM ester **2** (cl\_mc79c9\_15\_0m).

|     | x           | y            | z            | $U_{\text{iso}}^*/U_{\text{eq}}$ | Occ. (<1) |
|-----|-------------|--------------|--------------|----------------------------------|-----------|
| Br1 | 0.02894 (5) | 1.05457 (10) | 0.68368 (2)  | 0.0266 (2)                       |           |
| Br2 | 0.08166 (6) | 1.17726 (12) | 0.76352 (2)  | 0.0350 (3)                       |           |
| Br3 | 0.18871 (6) | 1.43084 (10) | 0.74216 (2)  | 0.0319 (3)                       |           |
| Br4 | 0.16281 (6) | 1.34256 (10) | 0.67173 (2)  | 0.0312 (2)                       |           |
| Br5 | 0.34861 (6) | 1.18979 (10) | 0.66708 (2)  | 0.0291 (2)                       |           |
| O1  | 0.0811 (4)  | 0.6612 (6)   | 0.73194 (15) | 0.0234 (15)                      |           |
| O2  | 0.0080 (4)  | 0.6753 (10)  | 0.64484 (18) | 0.052 (3)                        |           |
| O3  | 0.1109 (3)  | 0.7808 (7)   | 0.64407 (14) | 0.0248 (15)                      |           |
| N1  | 0.1372 (4)  | 0.7529 (8)   | 0.73070 (18) | 0.0240 (19)                      |           |
| C1  | 0.1129 (5)  | 1.0557 (9)   | 0.7132 (2)   | 0.021 (2)                        |           |
| H1  | 0.103684    | 0.989512     | 0.727787     | 0.025*                           |           |
| C2  | 0.1166 (5)  | 1.1914 (10)  | 0.7269 (2)   | 0.022 (2)                        |           |
| H2  | 0.083439    | 1.250918     | 0.715079     | 0.026*                           |           |
| C3  | 0.1899 (6)  | 1.2506 (9)   | 0.7289 (2)   | 0.024 (2)                        |           |

|      |              |              |              |              |  |
|------|--------------|--------------|--------------|--------------|--|
| H3   | 0.221481     | 1.198565     | 0.742956     | 0.029*       |  |
| C4   | 0.2220 (5)   | 1.2450 (9)   | 0.7015 (2)   | 0.020 (2)    |  |
| H4   | 0.270697     | 1.285552     | 0.704225     | 0.024*       |  |
| C5   | 0.3568 (6)   | 0.8796 (11)  | 0.6609 (2)   | 0.029 (2)    |  |
| H5   | 0.388780     | 0.940912     | 0.654006     | 0.034*       |  |
| C6   | 0.3679 (6)   | 0.7478 (11)  | 0.6576 (2)   | 0.028 (2)    |  |
| H6   | 0.407807     | 0.718196     | 0.648863     | 0.034*       |  |
| C7   | 0.3206 (5)   | 0.6564 (10)  | 0.6672 (2)   | 0.025 (2)    |  |
| H7   | 0.328575     | 0.564938     | 0.664771     | 0.030*       |  |
| C8   | 0.2629 (6)   | 0.6976 (10)  | 0.6799 (2)   | 0.025 (2)    |  |
| H8   | 0.231788     | 0.634189     | 0.686604     | 0.031*       |  |
| C9   | 0.1888 (5)   | 0.8781 (9)   | 0.69605 (19) | 0.0178 (19)  |  |
| C10  | 0.2859 (5)   | 1.0612 (9)   | 0.67944 (18) | 0.019 (2)    |  |
| C11  | 0.2291 (5)   | 1.1041 (9)   | 0.69315 (19) | 0.019 (2)    |  |
| C12  | 0.1776 (5)   | 1.0113 (9)   | 0.69995 (19) | 0.0187 (19)  |  |
| C13  | 0.2491 (5)   | 0.8317 (10)  | 0.6832 (2)   | 0.021 (2)    |  |
| C14  | 0.2985 (5)   | 0.9259 (10)  | 0.6743 (2)   | 0.021 (2)    |  |
| C15  | 0.1367 (5)   | 0.7815 (9)   | 0.7041 (2)   | 0.0179 (19)  |  |
| C16  | 0.0826 (5)   | 0.7100 (9)   | 0.6872 (2)   | 0.021 (2)    |  |
| C17  | 0.0498 (5)   | 0.6382 (9)   | 0.7053 (2)   | 0.024 (2)    |  |
| C18  | -0.0083 (6)  | 0.5369 (11)  | 0.7033 (3)   | 0.034 (3)    |  |
| H18A | 0.004996     | 0.465605     | 0.716545     | 0.051*       |  |
| H18B | -0.014946    | 0.501318     | 0.684197     | 0.051*       |  |
| H18C | -0.052942    | 0.577561     | 0.707644     | 0.051*       |  |
| C19  | 0.0631 (5)   | 0.7173 (10)  | 0.6568 (2)   | 0.025 (2)    |  |
| C20  | 0.0965 (5)   | 0.8041 (11)  | 0.6140 (2)   | 0.029 (2)    |  |
| H20A | 0.062075     | 0.737810     | 0.605505     | 0.035*       |  |
| H20B | 0.141252     | 0.796154     | 0.605121     | 0.035*       |  |
| C21  | 0.0661 (6)   | 0.9385 (11)  | 0.6094 (2)   | 0.033 (3)    |  |
| H21A | 0.099732     | 1.003317     | 0.618447     | 0.049*       |  |
| H21B | 0.020626     | 0.944277     | 0.617466     | 0.049*       |  |
| H21C | 0.058091     | 0.956537     | 0.589281     | 0.049*       |  |
| Br11 | 0.22889 (6)  | 0.51745 (11) | 0.40578 (2)  | 0.0314 (3)   |  |
| Br12 | 0.33992 (5)  | 0.35423 (8)  | 0.47445 (2)  | 0.01808 (19) |  |
| Br13 | 0.21356 (5)  | 0.11203 (8)  | 0.47973 (2)  | 0.0188 (2)   |  |
| Br14 | 0.09856 (5)  | 0.23132 (10) | 0.42249 (2)  | 0.0254 (2)   |  |
| Br15 | -0.04599 (5) | 0.38198 (9)  | 0.46281 (2)  | 0.0189 (2)   |  |

|      |             |             |              |             |  |
|------|-------------|-------------|--------------|-------------|--|
| O7   | 0.2849 (3)  | 0.8938 (6)  | 0.44168 (14) | 0.0181 (14) |  |
| O8   | 0.1192 (4)  | 0.9058 (8)  | 0.37354 (16) | 0.0337 (19) |  |
| O9   | 0.0770 (3)  | 0.7435 (6)  | 0.39888 (14) | 0.0196 (14) |  |
| N3   | 0.2497 (4)  | 0.8054 (7)  | 0.45822 (16) | 0.0138 (15) |  |
| C43  | 0.2232 (5)  | 0.5005 (8)  | 0.44654 (18) | 0.0134 (18) |  |
| H43  | 0.260454    | 0.559461    | 0.456353     | 0.016*      |  |
| C44  | 0.2438 (4)  | 0.3577 (8)  | 0.4546 (2)   | 0.0145 (18) |  |
| H44  | 0.243361    | 0.304260    | 0.437119     | 0.017*      |  |
| C45  | 0.1910 (5)  | 0.2966 (8)  | 0.4731 (2)   | 0.0148 (18) |  |
| H45  | 0.195988    | 0.343358    | 0.491518     | 0.018*      |  |
| C46  | 0.1153 (5)  | 0.3137 (8)  | 0.4597 (2)   | 0.0152 (19) |  |
| H46  | 0.082871    | 0.270338    | 0.472008     | 0.018*      |  |
| C47  | -0.0531 (5) | 0.6888 (9)  | 0.4680 (2)   | 0.019 (2)   |  |
| H47  | -0.091115   | 0.629384    | 0.470162     | 0.023*      |  |
| C48  | -0.0646 (5) | 0.8212 (10) | 0.4697 (2)   | 0.022 (2)   |  |
| H48  | -0.110576   | 0.852882    | 0.472862     | 0.026*      |  |
| C49  | -0.0090 (5) | 0.9112 (9)  | 0.4668 (2)   | 0.018 (2)   |  |
| H49  | -0.017029   | 1.003011    | 0.468449     | 0.021*      |  |
| C50  | 0.0563 (4)  | 0.8657 (8)  | 0.46157 (19) | 0.0142 (18) |  |
| H50  | 0.093241    | 0.926929    | 0.459193     | 0.017*      |  |
| C51  | 0.1385 (4)  | 0.6819 (8)  | 0.45347 (17) | 0.0099 (17) |  |
| C52  | 0.0304 (4)  | 0.5039 (8)  | 0.46163 (18) | 0.0124 (17) |  |
| C53  | 0.0141 (4)  | 0.6393 (8)  | 0.46327 (18) | 0.0129 (18) |  |
| C54  | 0.0704 (4)  | 0.7289 (9)  | 0.45959 (18) | 0.0126 (17) |  |
| C55  | 0.1517 (4)  | 0.5495 (8)  | 0.45300 (18) | 0.0109 (17) |  |
| C56  | 0.0967 (4)  | 0.4573 (8)  | 0.45805 (19) | 0.0135 (18) |  |
| C57  | 0.1894 (4)  | 0.7772 (8)  | 0.44327 (19) | 0.0119 (17) |  |
| C58  | 0.1804 (5)  | 0.8463 (8)  | 0.41728 (19) | 0.0143 (18) |  |
| C59  | 0.2424 (5)  | 0.9189 (8)  | 0.4180 (2)   | 0.0155 (19) |  |
| C60  | 0.2694 (5)  | 1.0112 (11) | 0.3979 (2)   | 0.029 (2)   |  |
| H60A | 0.282451    | 0.962052    | 0.381637     | 0.044*      |  |
| H60B | 0.311567    | 1.057252    | 0.406887     | 0.044*      |  |
| H60C | 0.232051    | 1.075372    | 0.391706     | 0.044*      |  |
| C61  | 0.1231 (5)  | 0.8383 (9)  | 0.3943 (2)   | 0.0180 (19) |  |
| C62  | 0.0173 (5)  | 0.7182 (11) | 0.3775 (2)   | 0.027 (2)   |  |
| H62A | 0.035032    | 0.688319    | 0.359956     | 0.032*      |  |
| H62B | -0.011384   | 0.799094    | 0.373604     | 0.032*      |  |

|      |             |              |              |              |  |
|------|-------------|--------------|--------------|--------------|--|
| C63  | -0.0267 (8) | 0.6133 (15)  | 0.3890 (3)   | 0.063 (5)    |  |
| H63A | -0.049028   | 0.648266     | 0.404949     | 0.095*       |  |
| H63B | 0.003980    | 0.538499     | 0.395215     | 0.095*       |  |
| H63C | -0.063971   | 0.584133     | 0.374455     | 0.095*       |  |
| Br6  | 0.72785 (6) | 0.97944 (11) | 0.40309 (2)  | 0.0306 (3)   |  |
| Br7  | 0.84059 (5) | 1.14200 (9)  | 0.47013 (2)  | 0.0229 (2)   |  |
| Br8  | 0.71527 (5) | 1.38208 (8)  | 0.47858 (2)  | 0.01714 (19) |  |
| Br9  | 0.59797 (5) | 1.27272 (9)  | 0.42242 (2)  | 0.0243 (2)   |  |
| Br10 | 0.45481 (5) | 1.11495 (9)  | 0.46308 (2)  | 0.0187 (2)   |  |
| O4   | 0.7847 (3)  | 0.6047 (6)   | 0.43918 (13) | 0.0162 (13)  |  |
| O5   | 0.6122 (3)  | 0.5523 (7)   | 0.37555 (14) | 0.0257 (16)  |  |
| O6   | 0.5711 (3)  | 0.7301 (7)   | 0.39706 (14) | 0.0224 (15)  |  |
| N2   | 0.7503 (4)  | 0.6974 (7)   | 0.45530 (17) | 0.0164 (16)  |  |
| C22  | 0.7225 (4)  | 0.9961 (8)   | 0.44357 (18) | 0.0115 (17)  |  |
| H22  | 0.760157    | 0.937373     | 0.453252     | 0.014*       |  |
| C23  | 0.7422 (4)  | 1.1384 (8)   | 0.45228 (19) | 0.0128 (17)  |  |
| H23  | 0.739624    | 1.193460     | 0.434955     | 0.015*       |  |
| C24  | 0.6932 (5)  | 1.1971 (8)   | 0.47124 (19) | 0.0124 (17)  |  |
| H24  | 0.700019    | 1.148697     | 0.489460     | 0.015*       |  |
| C25  | 0.6149 (5)  | 1.1816 (8)   | 0.45887 (19) | 0.0141 (18)  |  |
| H25  | 0.583819    | 1.222879     | 0.472021     | 0.017*       |  |
| C26  | 0.4480 (4)  | 0.8077 (9)   | 0.46840 (19) | 0.0155 (19)  |  |
| H26  | 0.410666    | 0.867299     | 0.471375     | 0.019*       |  |
| C27  | 0.4363 (5)  | 0.6759 (10)  | 0.4702 (2)   | 0.020 (2)    |  |
| H27  | 0.390965    | 0.644500     | 0.474241     | 0.025*       |  |
| C28  | 0.4909 (5)  | 0.5866 (9)   | 0.4661 (2)   | 0.019 (2)    |  |
| H28  | 0.482389    | 0.494771     | 0.467578     | 0.023*       |  |
| C29  | 0.5559 (5)  | 0.6296 (8)   | 0.46010 (19) | 0.0150 (18)  |  |
| H29  | 0.592408    | 0.567869     | 0.457369     | 0.018*       |  |
| C30  | 0.6356 (4)  | 0.8140 (8)   | 0.45057 (18) | 0.0116 (17)  |  |
| C31  | 0.5301 (5)  | 0.9919 (8)   | 0.46008 (19) | 0.0142 (18)  |  |
| C32  | 0.5967 (5)  | 1.0396 (8)   | 0.45625 (18) | 0.0130 (18)  |  |
| C33  | 0.6506 (4)  | 0.9469 (8)   | 0.45089 (18) | 0.0100 (17)  |  |
| C34  | 0.5695 (5)  | 0.7660 (8)   | 0.45787 (18) | 0.0132 (18)  |  |
| C35  | 0.5148 (4)  | 0.8578 (8)   | 0.46217 (19) | 0.0131 (18)  |  |
| C36  | 0.6871 (4)  | 0.7177 (8)   | 0.44096 (18) | 0.0116 (17)  |  |
| C37  | 0.6785 (4)  | 0.6405 (8)   | 0.41610 (19) | 0.0134 (18)  |  |

|      |             |              |              |             |  |
|------|-------------|--------------|--------------|-------------|--|
| C38  | 0.7406 (5)  | 0.5709 (8)   | 0.41650 (18) | 0.0125 (18) |  |
| C39  | 0.7696 (6)  | 0.4737 (10)  | 0.3977 (2)   | 0.027 (2)   |  |
| H39A | 0.770729    | 0.512732     | 0.379069     | 0.040*      |  |
| H39B | 0.739069    | 0.395302     | 0.396146     | 0.040*      |  |
| H39C | 0.818235    | 0.448777     | 0.405307     | 0.040*      |  |
| C40  | 0.6184 (5)  | 0.6345 (9)   | 0.39387 (18) | 0.0168 (19) |  |
| C41  | 0.5054 (5)  | 0.7324 (12)  | 0.3779 (2)   | 0.033 (3)   |  |
| H41A | 0.491415    | 0.641787     | 0.372039     | 0.040*      |  |
| H41B | 0.512385    | 0.784495     | 0.361052     | 0.040*      |  |
| C42  | 0.4487 (8)  | 0.794 (2)    | 0.3933 (3)   | 0.078 (6)   |  |
| H42A | 0.402468    | 0.788250     | 0.381751     | 0.117*      |  |
| H42B | 0.460648    | 0.886415     | 0.397164     | 0.117*      |  |
| H42C | 0.446000    | 0.747051     | 0.410955     | 0.117*      |  |
| Br16 | 0.48118 (5) | 0.50848 (11) | 0.31366 (2)  | 0.0281 (2)  |  |
| Br17 | 0.42909 (6) | 0.63288 (12) | 0.23344 (2)  | 0.0340 (3)  |  |
| Br18 | 0.31837 (6) | 0.88153 (10) | 0.25436 (2)  | 0.0281 (2)  |  |
| Br19 | 0.34711 (6) | 0.79880 (10) | 0.32453 (2)  | 0.0279 (2)  |  |
| Br20 | 0.16812 (6) | 0.63694 (11) | 0.33287 (2)  | 0.0295 (2)  |  |
| O10  | 0.4244 (4)  | 0.1205 (7)   | 0.25827 (15) | 0.0264 (16) |  |
| O11  | 0.4755 (4)  | 0.0408 (9)   | 0.34521 (17) | 0.039 (2)   |  |
| O12  | 0.4108 (4)  | 0.2257 (7)   | 0.34780 (14) | 0.0287 (17) |  |
| N4   | 0.3713 (4)  | 0.2153 (8)   | 0.26214 (18) | 0.0231 (18) |  |
| C64  | 0.3994 (5)  | 0.5087 (9)   | 0.28335 (19) | 0.0185 (19) |  |
| H64  | 0.409954    | 0.442951     | 0.268873     | 0.022*      |  |
| C65  | 0.3943 (6)  | 0.6452 (10)  | 0.2696 (2)   | 0.026 (2)   |  |
| H65  | 0.427121    | 0.705318     | 0.281393     | 0.031*      |  |
| C66  | 0.3203 (5)  | 0.7025 (9)   | 0.2680 (2)   | 0.021 (2)   |  |
| H66  | 0.289034    | 0.649147     | 0.254084     | 0.026*      |  |
| C67  | 0.2888 (5)  | 0.6934 (9)   | 0.2956 (2)   | 0.019 (2)   |  |
| H67  | 0.239413    | 0.730959     | 0.292973     | 0.023*      |  |
| C68  | 0.1614 (5)  | 0.3245 (10)  | 0.3390 (2)   | 0.024 (2)   |  |
| H68  | 0.130731    | 0.384341     | 0.347026     | 0.029*      |  |
| C69  | 0.1506 (6)  | 0.1928 (11)  | 0.3415 (2)   | 0.028 (2)   |  |
| H69  | 0.112257    | 0.161306     | 0.350958     | 0.034*      |  |
| C70  | 0.1964 (5)  | 0.1035 (10)  | 0.3299 (2)   | 0.026 (2)   |  |
| H70  | 0.188911    | 0.011623     | 0.331723     | 0.032*      |  |
| C71  | 0.2507 (5)  | 0.1463 (10)  | 0.3163 (2)   | 0.024 (2)   |  |

|      |             |              |              |             |          |
|------|-------------|--------------|--------------|-------------|----------|
| H71  | 0.280678    | 0.083715     | 0.308675     | 0.029*      |          |
| C72  | 0.3228 (5)  | 0.3286 (8)   | 0.29934 (19) | 0.0164 (19) |          |
| C73  | 0.2298 (5)  | 0.5108 (9)   | 0.3192 (2)   | 0.021 (2)   |          |
| C74  | 0.2841 (5)  | 0.5537 (9)   | 0.30493 (19) | 0.0173 (19) |          |
| C75  | 0.3329 (5)  | 0.4628 (9)   | 0.29616 (19) | 0.019 (2)   |          |
| C76  | 0.2644 (5)  | 0.2823 (10)  | 0.31306 (19) | 0.020 (2)   |          |
| C77  | 0.2181 (5)  | 0.3747 (10)  | 0.3245 (2)   | 0.022 (2)   |          |
| C78  | 0.3721 (5)  | 0.2307 (9)   | 0.2890 (2)   | 0.020 (2)   |          |
| C79  | 0.4232 (5)  | 0.1441 (9)   | 0.3038 (2)   | 0.021 (2)   |          |
| C80  | 0.4535 (6)  | 0.0785 (10)  | 0.2836 (2)   | 0.026 (2)   |          |
| C81  | 0.5091 (5)  | -0.0236 (10) | 0.2842 (3)   | 0.031 (2)   |          |
| H81A | 0.494258    | -0.091314    | 0.270209     | 0.046*      |          |
| H81B | 0.516076    | -0.063636    | 0.302811     | 0.046*      |          |
| H81C | 0.554103    | 0.016234     | 0.279882     | 0.046*      |          |
| C82  | 0.4398 (5)  | 0.1308 (10)  | 0.3338 (2)   | 0.026 (2)   |          |
| C83  | 0.4220 (10) | 0.2139 (19)  | 0.3779 (2)   | 0.025 (4)   | 0.68 (2) |
| H83A | 0.405413    | 0.127368     | 0.384019     | 0.030*      | 0.68 (2) |
| H83B | 0.473257    | 0.224666     | 0.384789     | 0.030*      | 0.68 (2) |
| C84  | 0.3802 (12) | 0.318 (2)    | 0.3876 (4)   | 0.044 (4)   | 0.68 (2) |
| H84A | 0.396106    | 0.402703     | 0.380536     | 0.067*      | 0.68 (2) |
| H84B | 0.386291    | 0.319731     | 0.408145     | 0.067*      | 0.68 (2) |
| H84C | 0.329668    | 0.304597     | 0.380919     | 0.067*      | 0.68 (2) |
| C83A | 0.434 (2)   | 0.253 (4)    | 0.3768 (3)   | 0.025 (4)   | 0.32 (2) |
| H83C | 0.409830    | 0.187483     | 0.387910     | 0.030*      | 0.32 (2) |
| H83D | 0.485532    | 0.233588     | 0.379857     | 0.030*      | 0.32 (2) |
| C84A | 0.424 (3)   | 0.379 (4)    | 0.3893 (8)   | 0.044 (4)   | 0.32 (2) |
| H84D | 0.382309    | 0.422664     | 0.379177     | 0.067*      | 0.32 (2) |
| H84E | 0.466603    | 0.432684     | 0.388244     | 0.067*      | 0.32 (2) |
| H84F | 0.415772    | 0.366776     | 0.408905     | 0.067*      | 0.32 (2) |

**Table S5.** Atomic displacement parameters ( $\text{\AA}^2$ ) for the Penta bromo AIM ester **2** (cl\_mc79c9\_15\_0m).

|     | $U^{11}$   | $U^{22}$   | $U^{33}$   | $U^{12}$   | $U^{13}$    | $U^{23}$    |
|-----|------------|------------|------------|------------|-------------|-------------|
| Br1 | 0.0223 (5) | 0.0309 (5) | 0.0260 (6) | 0.0032 (4) | 0.0003 (4)  | -0.0013 (5) |
| Br2 | 0.0394 (6) | 0.0415 (6) | 0.0253 (6) | 0.0004 (5) | 0.0097 (5)  | -0.0133 (5) |
| Br3 | 0.0399 (6) | 0.0192 (5) | 0.0336 (6) | 0.0063 (4) | -0.0101 (5) | -0.0093 (5) |

|      |            |            |            |             |             |             |
|------|------------|------------|------------|-------------|-------------|-------------|
| Br4  | 0.0408 (6) | 0.0208 (5) | 0.0300 (6) | 0.0037 (4)  | -0.0054 (5) | 0.0067 (4)  |
| Br5  | 0.0286 (5) | 0.0274 (5) | 0.0322 (6) | -0.0027 (4) | 0.0078 (5)  | 0.0057 (5)  |
| O1   | 0.028 (4)  | 0.015 (3)  | 0.027 (4)  | 0.000 (3)   | 0.001 (3)   | 0.006 (3)   |
| O2   | 0.034 (5)  | 0.089 (7)  | 0.035 (5)  | -0.028 (5)  | 0.007 (4)   | -0.010 (5)  |
| O3   | 0.021 (3)  | 0.030 (4)  | 0.022 (4)  | -0.001 (3)  | -0.003 (3)  | 0.003 (3)   |
| N1   | 0.028 (5)  | 0.014 (4)  | 0.030 (5)  | -0.001 (3)  | 0.001 (4)   | 0.001 (4)   |
| C1   | 0.026 (5)  | 0.018 (5)  | 0.019 (5)  | -0.005 (4)  | 0.000 (4)   | 0.005 (4)   |
| C2   | 0.035 (6)  | 0.021 (5)  | 0.011 (5)  | 0.009 (4)   | 0.003 (4)   | -0.004 (4)  |
| C3   | 0.034 (6)  | 0.013 (4)  | 0.024 (6)  | 0.004 (4)   | -0.005 (4)  | -0.010 (4)  |
| C4   | 0.022 (5)  | 0.015 (4)  | 0.022 (5)  | 0.003 (4)   | -0.002 (4)  | 0.000 (4)   |
| C5   | 0.037 (6)  | 0.036 (6)  | 0.015 (5)  | 0.006 (5)   | 0.009 (4)   | 0.004 (5)   |
| C6   | 0.032 (6)  | 0.036 (6)  | 0.019 (5)  | 0.008 (5)   | 0.009 (4)   | -0.005 (5)  |
| C7   | 0.032 (6)  | 0.026 (5)  | 0.016 (5)  | 0.008 (4)   | -0.006 (4)  | -0.009 (4)  |
| C8   | 0.031 (6)  | 0.021 (5)  | 0.022 (5)  | 0.005 (4)   | -0.007 (4)  | -0.006 (4)  |
| C9   | 0.020 (5)  | 0.017 (4)  | 0.016 (5)  | -0.002 (4)  | -0.001 (4)  | -0.003 (4)  |
| C10  | 0.029 (5)  | 0.022 (5)  | 0.005 (4)  | -0.002 (4)  | 0.000 (4)   | 0.005 (4)   |
| C11  | 0.033 (5)  | 0.014 (4)  | 0.008 (4)  | -0.003 (4)  | -0.001 (4)  | -0.004 (4)  |
| C12  | 0.026 (5)  | 0.018 (4)  | 0.011 (5)  | 0.007 (4)   | -0.001 (4)  | 0.000 (4)   |
| C13  | 0.024 (5)  | 0.025 (5)  | 0.013 (5)  | 0.007 (4)   | -0.001 (4)  | -0.007 (4)  |
| C14  | 0.023 (5)  | 0.027 (5)  | 0.014 (5)  | 0.001 (4)   | 0.000 (4)   | -0.001 (4)  |
| C15  | 0.024 (5)  | 0.015 (4)  | 0.016 (5)  | 0.005 (4)   | 0.005 (4)   | -0.002 (4)  |
| C16  | 0.018 (5)  | 0.019 (5)  | 0.026 (6)  | 0.005 (4)   | 0.001 (4)   | -0.006 (4)  |
| C17  | 0.023 (5)  | 0.019 (5)  | 0.030 (6)  | 0.009 (4)   | 0.005 (4)   | -0.012 (4)  |
| C18  | 0.031 (6)  | 0.031 (6)  | 0.043 (7)  | -0.005 (5)  | 0.010 (5)   | -0.005 (5)  |
| C19  | 0.023 (5)  | 0.032 (6)  | 0.021 (5)  | -0.005 (4)  | 0.006 (4)   | -0.013 (5)  |
| C20  | 0.022 (5)  | 0.044 (7)  | 0.020 (5)  | 0.005 (5)   | -0.002 (4)  | -0.003 (5)  |
| C21  | 0.029 (6)  | 0.038 (6)  | 0.031 (6)  | -0.008 (5)  | 0.003 (5)   | 0.007 (5)   |
| Br11 | 0.0454 (6) | 0.0289 (5) | 0.0231 (6) | 0.0141 (5)  | 0.0179 (5)  | 0.0076 (5)  |
| Br12 | 0.0118 (4) | 0.0113 (4) | 0.0306 (5) | 0.0022 (3)  | -0.0003 (4) | -0.0003 (4) |
| Br13 | 0.0214 (5) | 0.0072 (4) | 0.0271 (5) | -0.0002 (3) | -0.0004 (4) | 0.0015 (4)  |
| Br14 | 0.0268 (5) | 0.0200 (5) | 0.0274 (6) | -0.0022 (4) | -0.0053 (4) | -0.0097 (4) |
| Br15 | 0.0116 (4) | 0.0173 (4) | 0.0271 (5) | -0.0054 (3) | -0.0003 (4) | 0.0032 (4)  |
| O7   | 0.010 (3)  | 0.015 (3)  | 0.029 (4)  | -0.002 (2)  | 0.000 (3)   | 0.008 (3)   |
| O8   | 0.025 (4)  | 0.044 (5)  | 0.031 (4)  | -0.005 (3)  | 0.000 (3)   | 0.022 (4)   |
| O9   | 0.017 (3)  | 0.021 (3)  | 0.019 (4)  | -0.005 (3)  | -0.008 (3)  | 0.008 (3)   |
| N3   | 0.014 (4)  | 0.011 (3)  | 0.017 (4)  | -0.006 (3)  | 0.003 (3)   | 0.001 (3)   |
| C43  | 0.017 (4)  | 0.011 (4)  | 0.012 (4)  | 0.004 (3)   | -0.002 (3)  | 0.002 (4)   |

|      |            |            |            |             |             |             |
|------|------------|------------|------------|-------------|-------------|-------------|
| C44  | 0.015 (4)  | 0.007 (4)  | 0.022 (5)  | 0.001 (3)   | 0.000 (4)   | -0.003 (4)  |
| C45  | 0.019 (4)  | 0.006 (4)  | 0.018 (5)  | 0.000 (3)   | 0.000 (4)   | 0.000 (4)   |
| C46  | 0.014 (4)  | 0.009 (4)  | 0.022 (5)  | -0.001 (3)  | -0.001 (4)  | -0.003 (4)  |
| C47  | 0.016 (4)  | 0.022 (5)  | 0.019 (5)  | -0.001 (4)  | 0.003 (4)   | 0.004 (4)   |
| C48  | 0.009 (4)  | 0.029 (5)  | 0.027 (6)  | 0.007 (4)   | 0.003 (4)   | 0.003 (4)   |
| C49  | 0.019 (5)  | 0.014 (4)  | 0.021 (5)  | 0.008 (4)   | 0.007 (4)   | -0.005 (4)  |
| C50  | 0.011 (4)  | 0.010 (4)  | 0.020 (5)  | -0.001 (3)  | -0.002 (4)  | -0.001 (4)  |
| C51  | 0.009 (4)  | 0.015 (4)  | 0.007 (4)  | -0.002 (3)  | 0.001 (3)   | 0.000 (3)   |
| C52  | 0.009 (4)  | 0.015 (4)  | 0.012 (4)  | -0.004 (3)  | 0.000 (3)   | 0.005 (4)   |
| C53  | 0.012 (4)  | 0.014 (4)  | 0.010 (4)  | 0.001 (3)   | -0.006 (3)  | 0.005 (4)   |
| C54  | 0.011 (4)  | 0.017 (4)  | 0.011 (4)  | 0.000 (3)   | 0.002 (3)   | 0.003 (4)   |
| C55  | 0.011 (4)  | 0.013 (4)  | 0.008 (4)  | 0.003 (3)   | -0.003 (3)  | 0.002 (3)   |
| C56  | 0.011 (4)  | 0.013 (4)  | 0.016 (5)  | -0.003 (3)  | 0.000 (3)   | 0.003 (4)   |
| C57  | 0.008 (4)  | 0.008 (4)  | 0.019 (5)  | 0.001 (3)   | -0.002 (3)  | -0.001 (3)  |
| C58  | 0.017 (4)  | 0.009 (4)  | 0.017 (5)  | -0.001 (3)  | 0.003 (4)   | 0.006 (4)   |
| C59  | 0.017 (4)  | 0.011 (4)  | 0.018 (5)  | -0.001 (3)  | 0.002 (4)   | 0.005 (4)   |
| C60  | 0.020 (5)  | 0.032 (6)  | 0.036 (6)  | -0.002 (4)  | 0.010 (5)   | 0.021 (5)   |
| C61  | 0.018 (4)  | 0.017 (4)  | 0.019 (5)  | 0.004 (4)   | 0.004 (4)   | 0.002 (4)   |
| C62  | 0.021 (5)  | 0.042 (6)  | 0.016 (5)  | -0.006 (5)  | -0.005 (4)  | 0.003 (5)   |
| C63  | 0.062 (9)  | 0.071 (10) | 0.046 (8)  | -0.047 (8)  | -0.038 (7)  | 0.024 (8)   |
| Br6  | 0.0421 (6) | 0.0316 (6) | 0.0208 (5) | -0.0148 (5) | 0.0160 (5)  | -0.0077 (5) |
| Br7  | 0.0120 (4) | 0.0112 (4) | 0.0449 (6) | -0.0023 (3) | 0.0000 (4)  | -0.0024 (4) |
| Br8  | 0.0207 (4) | 0.0076 (4) | 0.0226 (5) | -0.0008 (3) | -0.0003 (4) | -0.0016 (4) |
| Br9  | 0.0267 (5) | 0.0179 (4) | 0.0258 (6) | 0.0001 (4)  | -0.0077 (4) | 0.0068 (4)  |
| Br10 | 0.0113 (4) | 0.0157 (4) | 0.0290 (5) | 0.0038 (3)  | 0.0015 (4)  | -0.0062 (4) |
| O4   | 0.016 (3)  | 0.009 (3)  | 0.023 (4)  | 0.003 (2)   | 0.004 (3)   | -0.006 (3)  |
| O5   | 0.021 (4)  | 0.033 (4)  | 0.021 (4)  | 0.003 (3)   | -0.005 (3)  | -0.012 (3)  |
| O6   | 0.015 (3)  | 0.030 (4)  | 0.021 (4)  | 0.008 (3)   | -0.007 (3)  | -0.006 (3)  |
| N2   | 0.015 (4)  | 0.007 (3)  | 0.028 (5)  | -0.002 (3)  | 0.002 (3)   | 0.001 (3)   |
| C22  | 0.013 (4)  | 0.005 (4)  | 0.017 (5)  | 0.002 (3)   | 0.007 (3)   | -0.004 (3)  |
| C23  | 0.010 (4)  | 0.013 (4)  | 0.015 (5)  | 0.000 (3)   | 0.000 (3)   | 0.002 (4)   |
| C24  | 0.019 (4)  | 0.003 (3)  | 0.014 (5)  | -0.001 (3)  | -0.001 (4)  | -0.003 (3)  |
| C25  | 0.016 (4)  | 0.013 (4)  | 0.015 (5)  | 0.000 (3)   | 0.004 (4)   | 0.001 (4)   |
| C26  | 0.010 (4)  | 0.017 (4)  | 0.019 (5)  | 0.001 (3)   | 0.001 (4)   | -0.005 (4)  |
| C27  | 0.012 (4)  | 0.033 (6)  | 0.017 (5)  | -0.004 (4)  | 0.003 (4)   | 0.001 (4)   |
| C28  | 0.017 (5)  | 0.015 (4)  | 0.023 (5)  | -0.007 (4)  | -0.003 (4)  | -0.001 (4)  |
| C29  | 0.016 (4)  | 0.011 (4)  | 0.018 (5)  | -0.003 (3)  | 0.003 (4)   | -0.003 (4)  |

|      |            |            |            |             |             |             |
|------|------------|------------|------------|-------------|-------------|-------------|
| C30  | 0.010 (4)  | 0.009 (4)  | 0.015 (5)  | -0.001 (3)  | -0.001 (3)  | -0.001 (3)  |
| C31  | 0.016 (4)  | 0.010 (4)  | 0.015 (5)  | 0.006 (3)   | -0.003 (4)  | -0.004 (4)  |
| C32  | 0.017 (4)  | 0.015 (4)  | 0.007 (4)  | 0.002 (3)   | 0.002 (3)   | -0.006 (3)  |
| C33  | 0.009 (4)  | 0.007 (4)  | 0.014 (4)  | -0.004 (3)  | 0.000 (3)   | 0.001 (3)   |
| C34  | 0.016 (4)  | 0.013 (4)  | 0.011 (4)  | -0.004 (3)  | 0.000 (3)   | -0.002 (3)  |
| C35  | 0.010 (4)  | 0.013 (4)  | 0.016 (5)  | 0.002 (3)   | 0.004 (3)   | -0.003 (4)  |
| C36  | 0.008 (4)  | 0.013 (4)  | 0.014 (5)  | 0.000 (3)   | 0.003 (3)   | 0.007 (3)   |
| C37  | 0.015 (4)  | 0.012 (4)  | 0.014 (5)  | -0.002 (3)  | 0.003 (3)   | 0.001 (4)   |
| C38  | 0.019 (4)  | 0.005 (4)  | 0.014 (5)  | -0.002 (3)  | 0.004 (4)   | 0.002 (3)   |
| C39  | 0.030 (6)  | 0.019 (5)  | 0.032 (6)  | 0.002 (4)   | 0.007 (5)   | -0.011 (5)  |
| C40  | 0.028 (5)  | 0.015 (4)  | 0.009 (4)  | -0.007 (4)  | 0.008 (4)   | 0.000 (4)   |
| C41  | 0.025 (5)  | 0.048 (7)  | 0.024 (6)  | 0.005 (5)   | -0.009 (5)  | -0.003 (5)  |
| C42  | 0.049 (9)  | 0.149 (18) | 0.033 (8)  | 0.025 (10)  | -0.009 (7)  | 0.000 (10)  |
| Br16 | 0.0222 (5) | 0.0333 (6) | 0.0279 (6) | -0.0015 (4) | -0.0009 (4) | 0.0026 (5)  |
| Br17 | 0.0367 (6) | 0.0425 (6) | 0.0242 (6) | -0.0006 (5) | 0.0091 (5)  | 0.0125 (5)  |
| Br18 | 0.0372 (6) | 0.0190 (5) | 0.0255 (6) | -0.0056 (4) | -0.0085 (4) | 0.0079 (4)  |
| Br19 | 0.0388 (6) | 0.0195 (5) | 0.0229 (5) | -0.0013 (4) | -0.0081 (4) | -0.0030 (4) |
| Br20 | 0.0326 (6) | 0.0277 (5) | 0.0297 (6) | 0.0021 (4)  | 0.0106 (5)  | -0.0021 (5) |
| O10  | 0.031 (4)  | 0.017 (3)  | 0.031 (4)  | 0.001 (3)   | 0.002 (3)   | 0.000 (3)   |
| O11  | 0.031 (4)  | 0.053 (5)  | 0.033 (5)  | 0.009 (4)   | -0.001 (4)  | 0.012 (4)   |
| O12  | 0.034 (4)  | 0.036 (4)  | 0.015 (4)  | -0.004 (3)  | -0.004 (3)  | 0.004 (3)   |
| N4   | 0.026 (4)  | 0.015 (4)  | 0.030 (5)  | 0.007 (3)   | 0.004 (4)   | 0.001 (4)   |
| C64  | 0.026 (5)  | 0.019 (5)  | 0.011 (5)  | -0.005 (4)  | 0.002 (4)   | -0.002 (4)  |
| C65  | 0.032 (6)  | 0.029 (5)  | 0.016 (5)  | 0.002 (4)   | 0.002 (4)   | 0.001 (4)   |
| C66  | 0.028 (5)  | 0.014 (4)  | 0.022 (5)  | -0.005 (4)  | 0.002 (4)   | 0.003 (4)   |
| C67  | 0.024 (5)  | 0.014 (4)  | 0.021 (5)  | -0.006 (4)  | 0.000 (4)   | 0.002 (4)   |
| C68  | 0.023 (5)  | 0.034 (6)  | 0.019 (5)  | -0.004 (4)  | 0.012 (4)   | 0.004 (4)   |
| C69  | 0.026 (5)  | 0.033 (6)  | 0.026 (6)  | -0.008 (5)  | 0.007 (4)   | 0.006 (5)   |
| C70  | 0.024 (5)  | 0.023 (5)  | 0.031 (6)  | -0.002 (4)  | -0.001 (4)  | 0.008 (5)   |
| C71  | 0.027 (5)  | 0.021 (5)  | 0.024 (6)  | -0.003 (4)  | 0.000 (4)   | 0.008 (4)   |
| C72  | 0.023 (5)  | 0.012 (4)  | 0.013 (5)  | -0.005 (4)  | -0.006 (4)  | 0.003 (4)   |
| C73  | 0.022 (5)  | 0.022 (5)  | 0.019 (5)  | 0.002 (4)   | 0.005 (4)   | -0.001 (4)  |
| C74  | 0.021 (5)  | 0.016 (4)  | 0.014 (5)  | -0.010 (4)  | -0.001 (4)  | -0.001 (4)  |
| C75  | 0.033 (5)  | 0.015 (4)  | 0.008 (4)  | -0.009 (4)  | 0.000 (4)   | 0.003 (4)   |
| C76  | 0.025 (5)  | 0.023 (5)  | 0.011 (5)  | -0.003 (4)  | -0.005 (4)  | 0.005 (4)   |
| C77  | 0.019 (5)  | 0.027 (5)  | 0.020 (5)  | -0.007 (4)  | 0.000 (4)   | 0.002 (4)   |
| C78  | 0.026 (5)  | 0.018 (5)  | 0.016 (5)  | -0.005 (4)  | 0.005 (4)   | 0.003 (4)   |

|      |            |            |           |            |            |           |
|------|------------|------------|-----------|------------|------------|-----------|
| C79  | 0.016 (4)  | 0.020 (5)  | 0.028 (6) | -0.011 (4) | 0.001 (4)  | 0.008 (4) |
| C80  | 0.030 (5)  | 0.018 (5)  | 0.028 (6) | -0.011 (4) | 0.001 (5)  | 0.007 (4) |
| C81  | 0.023 (5)  | 0.024 (5)  | 0.046 (7) | 0.006 (4)  | 0.005 (5)  | 0.003 (5) |
| C82  | 0.014 (4)  | 0.024 (5)  | 0.038 (6) | -0.002 (4) | -0.001 (4) | 0.006 (5) |
| C83  | 0.019 (8)  | 0.044 (10) | 0.011 (5) | -0.023 (7) | -0.004 (4) | 0.002 (6) |
| C84  | 0.060 (12) | 0.055 (10) | 0.015 (7) | 0.004 (8)  | -0.008 (8) | 0.002 (7) |
| C83A | 0.019 (8)  | 0.044 (10) | 0.011 (5) | -0.023 (7) | -0.004 (4) | 0.002 (6) |
| C84A | 0.060 (12) | 0.055 (10) | 0.015 (7) | 0.004 (8)  | -0.008 (8) | 0.002 (7) |

**Table S6.** Geometric parameters (Å, °) for the Penta bromo AIM ester **2** (cl\_mc79c9\_15\_0m).

|         |            |          |            |
|---------|------------|----------|------------|
| Br1—C1  | 2.003 (10) | Br10—C31 | 1.906 (8)  |
| Br2—C2  | 1.952 (9)  | O4—N2    | 1.420 (9)  |
| Br3—C3  | 1.940 (9)  | O4—C38   | 1.339 (11) |
| Br4—C4  | 1.980 (9)  | O5—C40   | 1.210 (11) |
| Br5—C10 | 1.899 (9)  | O6—C40   | 1.337 (11) |
| O1—N1   | 1.413 (10) | O6—C41   | 1.455 (11) |
| O1—C17  | 1.367 (12) | N2—C36   | 1.323 (11) |
| O2—C19  | 1.207 (12) | C22—H22  | 1.0000     |
| O3—C19  | 1.313 (12) | C22—C23  | 1.539 (11) |
| O3—C20  | 1.459 (12) | C22—C33  | 1.520 (11) |
| N1—C15  | 1.312 (12) | C23—H23  | 1.0000     |
| C1—H1   | 1.0000     | C23—C24  | 1.490 (12) |
| C1—C2   | 1.526 (13) | C24—H24  | 1.0000     |
| C1—C12  | 1.504 (13) | C24—C25  | 1.535 (12) |
| C2—H2   | 1.0000     | C25—H25  | 1.0000     |
| C2—C3   | 1.497 (14) | C25—C32  | 1.485 (12) |
| C3—H3   | 1.0000     | C26—H26  | 0.9500     |
| C3—C4   | 1.509 (14) | C26—C27  | 1.361 (13) |
| C4—H4   | 1.0000     | C26—C35  | 1.420 (12) |
| C4—C11  | 1.497 (13) | C27—H27  | 0.9500     |
| C5—H5   | 0.9500     | C27—C28  | 1.401 (13) |
| C5—C6   | 1.366 (15) | C28—H28  | 0.9500     |
| C5—C14  | 1.415 (14) | C28—C29  | 1.361 (12) |
| C6—H6   | 0.9500     | C29—H29  | 0.9500     |
| C6—C7   | 1.398 (15) | C29—C34  | 1.415 (12) |
| C7—H7   | 0.9500     | C30—C33  | 1.379 (11) |
| C7—C8   | 1.371 (14) | C30—C34  | 1.416 (12) |

|          |            |          |            |
|----------|------------|----------|------------|
| C8—H8    | 0.9500     | C30—C36  | 1.486 (11) |
| C8—C13   | 1.400 (13) | C31—C32  | 1.375 (12) |
| C9—C12   | 1.386 (13) | C31—C35  | 1.398 (12) |
| C9—C13   | 1.430 (13) | C32—C33  | 1.428 (11) |
| C9—C15   | 1.469 (13) | C34—C35  | 1.419 (12) |
| C10—C11  | 1.387 (13) | C36—C37  | 1.423 (12) |
| C10—C14  | 1.421 (14) | C37—C38  | 1.365 (12) |
| C11—C12  | 1.416 (13) | C37—C40  | 1.469 (13) |
| C13—C14  | 1.432 (14) | C38—C39  | 1.484 (12) |
| C15—C16  | 1.428 (13) | C39—H39A | 0.9800     |
| C16—C17  | 1.341 (14) | C39—H39B | 0.9800     |
| C16—C19  | 1.465 (14) | C39—H39C | 0.9800     |
| C17—C18  | 1.496 (14) | C41—H41A | 0.9900     |
| C18—H18A | 0.9800     | C41—H41B | 0.9900     |
| C18—H18B | 0.9800     | C41—C42  | 1.499 (18) |
| C18—H18C | 0.9800     | C42—H42A | 0.9800     |
| C20—H20A | 0.9900     | C42—H42B | 0.9800     |
| C20—H20B | 0.9900     | C42—H42C | 0.9800     |
| C20—C21  | 1.487 (15) | Br16—C64 | 1.998 (9)  |
| C21—H21A | 0.9800     | Br17—C65 | 1.927 (10) |
| C21—H21B | 0.9800     | Br18—C66 | 1.933 (9)  |
| C21—H21C | 0.9800     | Br19—C67 | 1.986 (9)  |
| Br11—C43 | 1.982 (9)  | Br20—C73 | 1.895 (9)  |
| Br12—C44 | 1.949 (9)  | O10—N4   | 1.415 (10) |
| Br13—C45 | 1.941 (8)  | O10—C80  | 1.346 (12) |
| Br14—C46 | 1.967 (9)  | O11—C82  | 1.229 (12) |
| Br15—C52 | 1.903 (8)  | O12—C82  | 1.328 (12) |
| O7—N3    | 1.412 (9)  | O12—C83  | 1.442 (12) |
| O7—C59   | 1.340 (11) | O12—C83A | 1.441 (14) |
| O8—C61   | 1.206 (11) | N4—C78   | 1.299 (12) |
| O9—C61   | 1.331 (11) | C64—H64  | 1.0000     |
| O9—C62   | 1.456 (11) | C64—C65  | 1.535 (13) |
| N3—C57   | 1.306 (11) | C64—C75  | 1.529 (13) |
| C43—H43  | 1.0000     | C65—H65  | 1.0000     |
| C43—C44  | 1.540 (11) | C65—C66  | 1.503 (14) |
| C43—C55  | 1.499 (11) | C66—H66  | 1.0000     |
| C44—H44  | 1.0000     | C66—C67  | 1.514 (13) |

|          |            |           |            |
|----------|------------|-----------|------------|
| C44—C45  | 1.537 (12) | C67—H67   | 1.0000     |
| C45—H45  | 1.0000     | C67—C74   | 1.494 (12) |
| C45—C46  | 1.506 (12) | C68—H68   | 0.9500     |
| C46—H46  | 1.0000     | C68—C69   | 1.361 (14) |
| C46—C56  | 1.501 (12) | C68—C77   | 1.429 (13) |
| C47—H47  | 0.9500     | C69—H69   | 0.9500     |
| C47—C48  | 1.367 (13) | C69—C70   | 1.409 (15) |
| C47—C53  | 1.403 (12) | C70—H70   | 0.9500     |
| C48—H48  | 0.9500     | C70—C71   | 1.344 (14) |
| C48—C49  | 1.407 (13) | C71—H71   | 0.9500     |
| C49—H49  | 0.9500     | C71—C76   | 1.417 (13) |
| C49—C50  | 1.362 (12) | C72—C75   | 1.387 (12) |
| C50—H50  | 0.9500     | C72—C76   | 1.423 (13) |
| C50—C54  | 1.420 (12) | C72—C78   | 1.483 (13) |
| C51—C54  | 1.428 (11) | C73—C74   | 1.364 (13) |
| C51—C55  | 1.368 (11) | C73—C77   | 1.428 (14) |
| C51—C57  | 1.483 (11) | C74—C75   | 1.400 (13) |
| C52—C53  | 1.413 (12) | C76—C77   | 1.433 (14) |
| C52—C56  | 1.363 (12) | C78—C79   | 1.434 (13) |
| C53—C54  | 1.423 (12) | C79—C80   | 1.356 (15) |
| C55—C56  | 1.436 (12) | C79—C82   | 1.446 (14) |
| C57—C58  | 1.427 (12) | C80—C81   | 1.471 (14) |
| C58—C59  | 1.378 (12) | C81—H81A  | 0.9800     |
| C58—C61  | 1.458 (13) | C81—H81B  | 0.9800     |
| C59—C60  | 1.477 (12) | C81—H81C  | 0.9800     |
| C60—H60A | 0.9800     | C83—H83A  | 0.9900     |
| C60—H60B | 0.9800     | C83—H83B  | 0.9900     |
| C60—H60C | 0.9800     | C83—C84   | 1.43 (2)   |
| C62—H62A | 0.9900     | C84—H84A  | 0.9800     |
| C62—H62B | 0.9900     | C84—H84B  | 0.9800     |
| C62—C63  | 1.494 (16) | C84—H84C  | 0.9800     |
| C63—H63A | 0.9800     | C83A—H83C | 0.9900     |
| C63—H63B | 0.9800     | C83A—H83D | 0.9900     |
| C63—H63C | 0.9800     | C83A—C84A | 1.43 (2)   |
| Br6—C22  | 1.967 (9)  | C84A—H84D | 0.9800     |
| Br7—C23  | 1.953 (8)  | C84A—H84E | 0.9800     |
| Br8—C24  | 1.948 (8)  | C84A—H84F | 0.9800     |

|            |            |             |           |
|------------|------------|-------------|-----------|
| Br9—C25    | 1.977 (9)  |             |           |
|            |            |             |           |
| C17—O1—N1  | 108.6 (7)  | C33—C22—H22 | 107.3     |
| C19—O3—C20 | 118.7 (8)  | C33—C22—C23 | 116.0 (7) |
| C15—N1—O1  | 105.2 (8)  | Br7—C23—H23 | 108.1     |
| Br1—C1—H1  | 107.9      | C22—C23—Br7 | 108.9 (6) |
| C2—C1—Br1  | 107.8 (7)  | C22—C23—H23 | 108.1     |
| C2—C1—H1   | 107.9      | C24—C23—Br7 | 110.1 (6) |
| C12—C1—Br1 | 108.0 (6)  | C24—C23—C22 | 113.4 (7) |
| C12—C1—H1  | 107.9      | C24—C23—H23 | 108.1     |
| C12—C1—C2  | 116.9 (8)  | Br8—C24—H24 | 108.2     |
| Br2—C2—H2  | 107.8      | C23—C24—Br8 | 111.3 (6) |
| C1—C2—Br2  | 108.6 (7)  | C23—C24—H24 | 108.2     |
| C1—C2—H2   | 107.8      | C23—C24—C25 | 110.7 (7) |
| C3—C2—Br2  | 111.9 (7)  | C25—C24—Br8 | 110.2 (6) |
| C3—C2—C1   | 112.8 (8)  | C25—C24—H24 | 108.2     |
| C3—C2—H2   | 107.8      | Br9—C25—H25 | 108.4     |
| Br3—C3—H3  | 107.7      | C24—C25—Br9 | 110.4 (6) |
| C2—C3—Br3  | 110.8 (7)  | C24—C25—H25 | 108.4     |
| C2—C3—H3   | 107.7      | C32—C25—Br9 | 111.5 (6) |
| C2—C3—C4   | 112.6 (8)  | C32—C25—C24 | 109.6 (7) |
| C4—C3—Br3  | 110.1 (7)  | C32—C25—H25 | 108.4     |
| C4—C3—H3   | 107.7      | C27—C26—H26 | 119.3     |
| Br4—C4—H4  | 108.7      | C27—C26—C35 | 121.3 (8) |
| C3—C4—Br4  | 111.4 (6)  | C35—C26—H26 | 119.3     |
| C3—C4—H4   | 108.7      | C26—C27—H27 | 119.9     |
| C11—C4—Br4 | 110.2 (7)  | C26—C27—C28 | 120.1 (8) |
| C11—C4—C3  | 109.1 (8)  | C28—C27—H27 | 119.9     |
| C11—C4—H4  | 108.7      | C27—C28—H28 | 119.6     |
| C6—C5—H5   | 119.6      | C29—C28—C27 | 120.8 (9) |
| C6—C5—C14  | 120.9 (10) | C29—C28—H28 | 119.6     |
| C14—C5—H5  | 119.6      | C28—C29—H29 | 119.8     |
| C5—C6—H6   | 119.9      | C28—C29—C34 | 120.3 (8) |
| C5—C6—C7   | 120.2 (10) | C34—C29—H29 | 119.8     |
| C7—C6—H6   | 119.9      | C33—C30—C34 | 121.2 (8) |
| C6—C7—H7   | 119.7      | C33—C30—C36 | 120.5 (7) |
| C8—C7—C6   | 120.6 (10) | C34—C30—C36 | 118.2 (7) |

|               |            |               |           |
|---------------|------------|---------------|-----------|
| C8—C7—H7      | 119.7      | C32—C31—Br10  | 118.3 (6) |
| C7—C8—H8      | 119.5      | C32—C31—C35   | 123.4 (8) |
| C7—C8—C13     | 121.0 (10) | C35—C31—Br10  | 118.3 (6) |
| C13—C8—H8     | 119.5      | C31—C32—C25   | 122.4 (8) |
| C12—C9—C13    | 121.3 (9)  | C31—C32—C33   | 117.9 (8) |
| C12—C9—C15    | 120.1 (8)  | C33—C32—C25   | 119.6 (8) |
| C13—C9—C15    | 118.5 (8)  | C30—C33—C22   | 120.4 (7) |
| C11—C10—Br5   | 118.1 (7)  | C30—C33—C32   | 119.9 (8) |
| C11—C10—C14   | 122.5 (9)  | C32—C33—C22   | 119.6 (7) |
| C14—C10—Br5   | 119.4 (7)  | C29—C34—C30   | 121.7 (8) |
| C10—C11—C4    | 121.7 (9)  | C29—C34—C35   | 119.5 (8) |
| C10—C11—C12   | 119.0 (8)  | C30—C34—C35   | 118.7 (8) |
| C12—C11—C4    | 119.3 (8)  | C31—C35—C26   | 123.9 (8) |
| C9—C12—C1     | 119.5 (9)  | C31—C35—C34   | 118.2 (8) |
| C9—C12—C11    | 120.0 (9)  | C34—C35—C26   | 117.9 (8) |
| C11—C12—C1    | 120.4 (8)  | N2—C36—C30    | 121.3 (8) |
| C8—C13—C9     | 122.4 (9)  | N2—C36—C37    | 111.3 (7) |
| C8—C13—C14    | 118.8 (9)  | C37—C36—C30   | 127.3 (8) |
| C9—C13—C14    | 118.8 (9)  | C36—C37—C40   | 129.8 (8) |
| C5—C14—C10    | 123.6 (9)  | C38—C37—C36   | 104.9 (8) |
| C5—C14—C13    | 118.5 (9)  | C38—C37—C40   | 125.3 (8) |
| C10—C14—C13   | 117.9 (9)  | O4—C38—C37    | 109.2 (7) |
| N1—C15—C9     | 118.1 (9)  | O4—C38—C39    | 115.6 (8) |
| N1—C15—C16    | 111.7 (9)  | C37—C38—C39   | 135.1 (9) |
| C16—C15—C9    | 130.1 (9)  | C38—C39—H39A  | 109.5     |
| C15—C16—C19   | 128.6 (9)  | C38—C39—H39B  | 109.5     |
| C17—C16—C15   | 104.8 (9)  | C38—C39—H39C  | 109.5     |
| C17—C16—C19   | 126.5 (9)  | H39A—C39—H39B | 109.5     |
| O1—C17—C18    | 114.6 (9)  | H39A—C39—H39C | 109.5     |
| C16—C17—O1    | 109.6 (9)  | H39B—C39—H39C | 109.5     |
| C16—C17—C18   | 135.7 (10) | O5—C40—O6     | 125.0 (9) |
| C17—C18—H18A  | 109.5      | O5—C40—C37    | 124.2 (9) |
| C17—C18—H18B  | 109.5      | O6—C40—C37    | 110.8 (7) |
| C17—C18—H18C  | 109.5      | O6—C41—H41A   | 110.3     |
| H18A—C18—H18B | 109.5      | O6—C41—H41B   | 110.3     |
| H18A—C18—H18C | 109.5      | O6—C41—C42    | 107.2 (9) |
| H18B—C18—H18C | 109.5      | H41A—C41—H41B | 108.5     |

|               |            |               |            |
|---------------|------------|---------------|------------|
| O2—C19—O3     | 123.2 (10) | C42—C41—H41A  | 110.3      |
| O2—C19—C16    | 124.3 (10) | C42—C41—H41B  | 110.3      |
| O3—C19—C16    | 112.4 (8)  | C41—C42—H42A  | 109.5      |
| O3—C20—H20A   | 109.9      | C41—C42—H42B  | 109.5      |
| O3—C20—H20B   | 109.9      | C41—C42—H42C  | 109.5      |
| O3—C20—C21    | 108.8 (9)  | H42A—C42—H42B | 109.5      |
| H20A—C20—H20B | 108.3      | H42A—C42—H42C | 109.5      |
| C21—C20—H20A  | 109.9      | H42B—C42—H42C | 109.5      |
| C21—C20—H20B  | 109.9      | C80—O10—N4    | 108.7 (8)  |
| C20—C21—H21A  | 109.5      | C82—O12—C83   | 115.3 (11) |
| C20—C21—H21B  | 109.5      | C82—O12—C83A  | 122.5 (18) |
| C20—C21—H21C  | 109.5      | C78—N4—O10    | 106.4 (8)  |
| H21A—C21—H21B | 109.5      | Br16—C64—H64  | 108.1      |
| H21A—C21—H21C | 109.5      | C65—C64—Br16  | 108.8 (6)  |
| H21B—C21—H21C | 109.5      | C65—C64—H64   | 108.1      |
| C59—O7—N3     | 109.1 (6)  | C75—C64—Br16  | 107.7 (6)  |
| C61—O9—C62    | 118.4 (7)  | C75—C64—H64   | 108.1      |
| C57—N3—O7     | 105.2 (7)  | C75—C64—C65   | 115.7 (8)  |
| Br11—C43—H43  | 107.6      | Br17—C65—H65  | 107.5      |
| C44—C43—Br11  | 106.9 (6)  | C64—C65—Br17  | 108.6 (7)  |
| C44—C43—H43   | 107.6      | C64—C65—H65   | 107.5      |
| C55—C43—Br11  | 108.9 (6)  | C66—C65—Br17  | 112.7 (7)  |
| C55—C43—H43   | 107.6      | C66—C65—C64   | 112.7 (8)  |
| C55—C43—C44   | 117.9 (7)  | C66—C65—H65   | 107.5      |
| Br12—C44—H44  | 108.8      | Br18—C66—H66  | 107.2      |
| C43—C44—Br12  | 109.5 (6)  | C65—C66—Br18  | 111.3 (7)  |
| C43—C44—H44   | 108.8      | C65—C66—H66   | 107.2      |
| C45—C44—Br12  | 109.5 (6)  | C65—C66—C67   | 112.5 (8)  |
| C45—C44—C43   | 111.4 (7)  | C67—C66—Br18  | 111.2 (6)  |
| C45—C44—H44   | 108.8      | C67—C66—H66   | 107.2      |
| Br13—C45—H45  | 108.5      | Br19—C67—H67  | 108.4      |
| C44—C45—Br13  | 110.0 (6)  | C66—C67—Br19  | 110.0 (6)  |
| C44—C45—H45   | 108.5      | C66—C67—H67   | 108.4      |
| C46—C45—Br13  | 111.2 (6)  | C74—C67—Br19  | 110.4 (6)  |
| C46—C45—C44   | 110.2 (7)  | C74—C67—C66   | 111.3 (8)  |
| C46—C45—H45   | 108.5      | C74—C67—H67   | 108.4      |
| Br14—C46—H46  | 107.7      | C69—C68—H68   | 119.3      |

|              |           |              |            |
|--------------|-----------|--------------|------------|
| C45—C46—Br14 | 112.9 (6) | C69—C68—C77  | 121.4 (10) |
| C45—C46—H46  | 107.7     | C77—C68—H68  | 119.3      |
| C56—C46—Br14 | 110.7 (6) | C68—C69—H69  | 120.2      |
| C56—C46—C45  | 109.8 (7) | C68—C69—C70  | 119.6 (9)  |
| C56—C46—H46  | 107.7     | C70—C69—H69  | 120.2      |
| C48—C47—H47  | 119.5     | C69—C70—H70  | 119.5      |
| C48—C47—C53  | 121.0 (9) | C71—C70—C69  | 121.1 (10) |
| C53—C47—H47  | 119.5     | C71—C70—H70  | 119.5      |
| C47—C48—H48  | 119.7     | C70—C71—H71  | 119.1      |
| C47—C48—C49  | 120.6 (8) | C70—C71—C76  | 121.7 (10) |
| C49—C48—H48  | 119.7     | C76—C71—H71  | 119.1      |
| C48—C49—H49  | 120.2     | C75—C72—C76  | 119.9 (9)  |
| C50—C49—C48  | 119.6 (8) | C75—C72—C78  | 121.6 (9)  |
| C50—C49—H49  | 120.2     | C76—C72—C78  | 118.5 (8)  |
| C49—C50—H50  | 119.2     | C74—C73—Br20 | 118.7 (7)  |
| C49—C50—C54  | 121.6 (8) | C74—C73—C77  | 122.6 (9)  |
| C54—C50—H50  | 119.2     | C77—C73—Br20 | 118.7 (7)  |
| C54—C51—C57  | 118.4 (7) | C73—C74—C67  | 121.8 (9)  |
| C55—C51—C54  | 120.0 (8) | C73—C74—C75  | 119.6 (8)  |
| C55—C51—C57  | 120.8 (7) | C75—C74—C67  | 118.3 (8)  |
| C53—C52—Br15 | 117.6 (6) | C72—C75—C64  | 118.2 (9)  |
| C56—C52—Br15 | 118.8 (6) | C72—C75—C74  | 120.9 (9)  |
| C56—C52—C53  | 123.5 (8) | C74—C75—C64  | 120.9 (8)  |
| C47—C53—C52  | 124.3 (8) | C71—C76—C72  | 122.2 (9)  |
| C47—C53—C54  | 119.2 (8) | C71—C76—C77  | 118.1 (9)  |
| C52—C53—C54  | 116.5 (8) | C72—C76—C77  | 119.7 (9)  |
| C50—C54—C51  | 121.4 (8) | C68—C77—C76  | 118.1 (9)  |
| C50—C54—C53  | 118.0 (8) | C73—C77—C68  | 124.9 (9)  |
| C53—C54—C51  | 120.6 (8) | C73—C77—C76  | 116.9 (8)  |
| C51—C55—C43  | 119.9 (8) | N4—C78—C72   | 118.5 (9)  |
| C51—C55—C56  | 120.2 (8) | N4—C78—C79   | 110.6 (9)  |
| C56—C55—C43  | 119.9 (7) | C79—C78—C72  | 131.0 (9)  |
| C52—C56—C46  | 122.9 (8) | C78—C79—C82  | 127.6 (9)  |
| C52—C56—C55  | 118.8 (8) | C80—C79—C78  | 105.0 (9)  |
| C55—C56—C46  | 118.3 (7) | C80—C79—C82  | 127.5 (9)  |
| N3—C57—C51   | 121.0 (8) | O10—C80—C79  | 109.3 (9)  |
| N3—C57—C58   | 112.6 (8) | O10—C80—C81  | 117.3 (10) |

|               |           |                 |            |
|---------------|-----------|-----------------|------------|
| C58—C57—C51   | 126.4 (8) | C79—C80—C81     | 133.4 (10) |
| C57—C58—C61   | 130.0 (8) | C80—C81—H81A    | 109.5      |
| C59—C58—C57   | 102.9 (8) | C80—C81—H81B    | 109.5      |
| C59—C58—C61   | 127.0 (8) | C80—C81—H81C    | 109.5      |
| O7—C59—C58    | 110.0 (7) | H81A—C81—H81B   | 109.5      |
| O7—C59—C60    | 117.5 (8) | H81A—C81—H81C   | 109.5      |
| C58—C59—C60   | 132.5 (9) | H81B—C81—H81C   | 109.5      |
| C59—C60—H60A  | 109.5     | O11—C82—O12     | 123.2 (10) |
| C59—C60—H60B  | 109.5     | O11—C82—C79     | 124.2 (10) |
| C59—C60—H60C  | 109.5     | O12—C82—C79     | 112.6 (9)  |
| H60A—C60—H60B | 109.5     | O12—C83—H83A    | 110.9      |
| H60A—C60—H60C | 109.5     | O12—C83—H83B    | 110.9      |
| H60B—C60—H60C | 109.5     | H83A—C83—H83B   | 109.0      |
| O8—C61—O9     | 124.6 (9) | C84—C83—O12     | 104.1 (13) |
| O8—C61—C58    | 124.5 (9) | C84—C83—H83A    | 110.9      |
| O9—C61—C58    | 110.8 (8) | C84—C83—H83B    | 110.9      |
| O9—C62—H62A   | 110.5     | C83—C84—H84A    | 109.5      |
| O9—C62—H62B   | 110.5     | C83—C84—H84B    | 109.5      |
| O9—C62—C63    | 106.3 (8) | C83—C84—H84C    | 109.5      |
| H62A—C62—H62B | 108.7     | H84A—C84—H84B   | 109.5      |
| C63—C62—H62A  | 110.5     | H84A—C84—H84C   | 109.5      |
| C63—C62—H62B  | 110.5     | H84B—C84—H84C   | 109.5      |
| C62—C63—H63A  | 109.5     | O12—C83A—H83C   | 106.7      |
| C62—C63—H63B  | 109.5     | O12—C83A—H83D   | 106.7      |
| C62—C63—H63C  | 109.5     | H83C—C83A—H83D  | 106.6      |
| H63A—C63—H63B | 109.5     | C84A—C83A—O12   | 123 (3)    |
| H63A—C63—H63C | 109.5     | C84A—C83A—H83C  | 106.7      |
| H63B—C63—H63C | 109.5     | C84A—C83A—H83D  | 106.7      |
| C38—O4—N2     | 109.7 (6) | C83A—C84A—H84D  | 109.5      |
| C40—O6—C41    | 117.9 (8) | C83A—C84A—H84E  | 109.5      |
| C36—N2—O4     | 104.8 (7) | C83A—C84A—H84F  | 109.5      |
| Br6—C22—H22   | 107.3     | H84D—C84A—H84E  | 109.5      |
| C23—C22—Br6   | 108.2 (6) | H84D—C84A—H84F  | 109.5      |
| C23—C22—H22   | 107.3     | H84E—C84A—H84F  | 109.5      |
| C33—C22—Br6   | 110.2 (6) |                 |            |
|               |           |                 |            |
| Br1—C1—C2—Br2 | 104.3 (6) | Br6—C22—C33—C30 | 73.0 (9)   |

|                 |            |                  |            |
|-----------------|------------|------------------|------------|
| Br1—C1—C2—C3    | -131.1 (7) | Br6—C22—C33—C32  | -102.7 (8) |
| Br1—C1—C12—C9   | -80.7 (9)  | Br7—C23—C24—Br8  | 63.2 (7)   |
| Br1—C1—C12—C11  | 103.4 (9)  | Br7—C23—C24—C25  | -173.9 (6) |
| Br2—C2—C3—Br3   | -64.2 (8)  | Br8—C24—C25—Br9  | 62.8 (7)   |
| Br2—C2—C3—C4    | 172.0 (6)  | Br8—C24—C25—C32  | -173.9 (6) |
| Br3—C3—C4—Br4   | -63.8 (8)  | Br9—C25—C32—C31  | -92.0 (9)  |
| Br3—C3—C4—C11   | 174.4 (7)  | Br9—C25—C32—C33  | 91.1 (9)   |
| Br4—C4—C11—C10  | 92.4 (10)  | Br10—C31—C32—C25 | 9.9 (12)   |
| Br4—C4—C11—C12  | -89.1 (9)  | Br10—C31—C32—C33 | -173.1 (6) |
| Br5—C10—C11—C4  | -8.0 (12)  | Br10—C31—C35—C26 | -4.7 (13)  |
| Br5—C10—C11—C12 | 173.5 (7)  | Br10—C31—C35—C34 | 175.4 (7)  |
| Br5—C10—C14—C5  | 1.6 (14)   | O4—N2—C36—C30    | -177.6 (7) |
| Br5—C10—C14—C13 | -178.4 (7) | O4—N2—C36—C37    | 0.6 (9)    |
| O1—N1—C15—C9    | 178.7 (7)  | N2—O4—C38—C37    | 2.1 (9)    |
| O1—N1—C15—C16   | -1.0 (10)  | N2—O4—C38—C39    | -179.8 (7) |
| N1—O1—C17—C16   | -0.1 (10)  | N2—C36—C37—C38   | 0.6 (10)   |
| N1—O1—C17—C18   | 176.9 (8)  | N2—C36—C37—C40   | -178.3 (8) |
| N1—C15—C16—C17  | 0.9 (11)   | C22—C23—C24—Br8  | -174.5 (6) |
| N1—C15—C16—C19  | 177.7 (9)  | C22—C23—C24—C25  | -51.6 (10) |
| C1—C2—C3—Br3    | 173.0 (7)  | C23—C22—C33—C30  | -163.6 (8) |
| C1—C2—C3—C4     | 49.2 (11)  | C23—C22—C33—C32  | 20.7 (12)  |
| C2—C1—C12—C9    | 157.6 (9)  | C23—C24—C25—Br9  | -60.7 (8)  |
| C2—C1—C12—C11   | -18.3 (13) | C23—C24—C25—C32  | 62.5 (9)   |
| C2—C3—C4—Br4    | 60.4 (9)   | C24—C25—C32—C31  | 145.4 (9)  |
| C2—C3—C4—C11    | -61.4 (11) | C24—C25—C32—C33  | -31.5 (11) |
| C3—C4—C11—C10   | -145.0 (9) | C25—C32—C33—C22  | -9.3 (12)  |
| C3—C4—C11—C12   | 33.5 (12)  | C25—C32—C33—C30  | 175.0 (8)  |
| C4—C11—C12—C1   | 5.3 (13)   | C26—C27—C28—C29  | -0.5 (15)  |
| C4—C11—C12—C9   | -170.6 (9) | C27—C26—C35—C31  | -179.9 (9) |
| C5—C6—C7—C8     | -0.2 (16)  | C27—C26—C35—C34  | -0.1 (14)  |
| C6—C5—C14—C10   | 177.1 (10) | C27—C28—C29—C34  | 0.0 (15)   |
| C6—C5—C14—C13   | -3.0 (15)  | C28—C29—C34—C30  | -177.5 (9) |
| C6—C7—C8—C13    | 1.2 (15)   | C28—C29—C34—C35  | 0.4 (14)   |
| C7—C8—C13—C9    | 179.1 (9)  | C29—C34—C35—C26  | -0.4 (13)  |
| C7—C8—C13—C14   | -3.1 (15)  | C29—C34—C35—C31  | 179.4 (8)  |
| C8—C13—C14—C5   | 3.9 (14)   | C30—C34—C35—C26  | 177.6 (8)  |
| C8—C13—C14—C10  | -176.1 (9) | C30—C34—C35—C31  | -2.6 (13)  |

|                 |             |                   |             |
|-----------------|-------------|-------------------|-------------|
| C9—C13—C14—C5   | -178.1 (9)  | C30—C36—C37—C38   | 178.6 (8)   |
| C9—C13—C14—C10  | 1.8 (14)    | C30—C36—C37—C40   | -0.3 (15)   |
| C9—C15—C16—C17  | -178.7 (9)  | C31—C32—C33—C22   | 173.7 (8)   |
| C9—C15—C16—C19  | -1.9 (16)   | C31—C32—C33—C30   | -2.0 (13)   |
| C10—C11—C12—C1  | -176.2 (8)  | C32—C31—C35—C26   | 174.6 (9)   |
| C10—C11—C12—C9  | 7.9 (14)    | C32—C31—C35—C34   | -5.2 (14)   |
| C11—C10—C14—C5  | -178.7 (9)  | C33—C22—C23—Br7   | 133.7 (7)   |
| C11—C10—C14—C13 | 1.4 (14)    | C33—C22—C23—C24   | 10.7 (11)   |
| C12—C1—C2—Br2   | -133.9 (7)  | C33—C30—C34—C29   | -174.1 (9)  |
| C12—C1—C2—C3    | -9.3 (12)   | C33—C30—C34—C35   | 7.9 (13)    |
| C12—C9—C13—C8   | 177.8 (9)   | C33—C30—C36—N2    | 66.9 (12)   |
| C12—C9—C13—C14  | -0.1 (14)   | C33—C30—C36—C37   | -110.9 (10) |
| C12—C9—C15—N1   | -77.3 (12)  | C34—C30—C33—C22   | 178.7 (8)   |
| C12—C9—C15—C16  | 102.2 (12)  | C34—C30—C33—C32   | -5.6 (14)   |
| C13—C9—C12—C1   | 179.2 (9)   | C34—C30—C36—N2    | -116.5 (9)  |
| C13—C9—C12—C11  | -4.8 (14)   | C34—C30—C36—C37   | 65.7 (12)   |
| C13—C9—C15—N1   | 105.2 (10)  | C35—C26—C27—C28   | 0.6 (15)    |
| C13—C9—C15—C16  | -75.2 (13)  | C35—C31—C32—C25   | -169.4 (9)  |
| C14—C5—C6—C7    | 1.1 (16)    | C35—C31—C32—C33   | 7.5 (14)    |
| C14—C10—C11—C4  | 172.3 (9)   | C36—C30—C33—C22   | -4.8 (13)   |
| C14—C10—C11—C12 | -6.2 (14)   | C36—C30—C33—C32   | 170.9 (8)   |
| C15—C9—C12—C1   | 1.8 (14)    | C36—C30—C34—C29   | 9.3 (13)    |
| C15—C9—C12—C11  | 177.7 (9)   | C36—C30—C34—C35   | -168.7 (8)  |
| C15—C9—C13—C8   | -4.8 (14)   | C36—C37—C38—O4    | -1.7 (9)    |
| C15—C9—C13—C14  | 177.4 (9)   | C36—C37—C38—C39   | -179.3 (10) |
| C15—C16—C17—O1  | -0.5 (10)   | C36—C37—C40—O5    | -169.3 (9)  |
| C15—C16—C17—C18 | -176.5 (11) | C36—C37—C40—O6    | 9.5 (13)    |
| C15—C16—C19—O2  | -163.9 (11) | C38—O4—N2—C36     | -1.6 (8)    |
| C15—C16—C19—O3  | 13.0 (14)   | C38—C37—C40—O5    | 12.0 (14)   |
| C17—O1—N1—C15   | 0.7 (9)     | C38—C37—C40—O6    | -169.2 (8)  |
| C17—C16—C19—O2  | 12.2 (17)   | C40—O6—C41—C42    | 151.1 (11)  |
| C17—C16—C19—O3  | -170.9 (9)  | C40—C37—C38—O4    | 177.3 (8)   |
| C19—O3—C20—C21  | 96.6 (11)   | C40—C37—C38—C39   | -0.3 (16)   |
| C19—C16—C17—O1  | -177.3 (9)  | C41—O6—C40—O5     | 3.1 (14)    |
| C19—C16—C17—C18 | 6.7 (18)    | C41—O6—C40—C37    | -175.6 (8)  |
| C20—O3—C19—O2   | 1.1 (16)    | Br16—C64—C65—Br17 | 105.8 (6)   |
| C20—O3—C19—C16  | -175.8 (8)  | Br16—C64—C65—C66  | -128.7 (8)  |

|                   |            |                   |            |
|-------------------|------------|-------------------|------------|
| Br11—C43—C44—Br12 | 105.4 (5)  | Br16—C64—C75—C72  | -81.7 (9)  |
| Br11—C43—C44—C45  | -133.3 (6) | Br16—C64—C75—C74  | 97.1 (9)   |
| Br11—C43—C55—C51  | -75.8 (9)  | Br17—C65—C66—Br18 | -63.0 (8)  |
| Br11—C43—C55—C56  | 102.8 (8)  | Br17—C65—C66—C67  | 171.5 (6)  |
| Br12—C44—C45—Br13 | -64.1 (7)  | Br18—C66—C67—Br19 | -62.5 (8)  |
| Br12—C44—C45—C46  | 172.9 (6)  | Br18—C66—C67—C74  | 174.9 (6)  |
| Br13—C45—C46—Br14 | -62.8 (7)  | Br19—C67—C74—C73  | 91.6 (10)  |
| Br13—C45—C46—C56  | 173.1 (6)  | Br19—C67—C74—C75  | -95.1 (9)  |
| Br14—C46—C56—C52  | 91.0 (10)  | Br20—C73—C74—C67  | -10.6 (13) |
| Br14—C46—C56—C55  | -90.1 (8)  | Br20—C73—C74—C75  | 176.1 (7)  |
| Br15—C52—C53—C47  | 5.6 (12)   | Br20—C73—C77—C68  | 1.8 (14)   |
| Br15—C52—C53—C54  | -174.0 (6) | Br20—C73—C77—C76  | 178.0 (7)  |
| Br15—C52—C56—C46  | -10.3 (12) | O10—N4—C78—C72    | 178.1 (7)  |
| Br15—C52—C56—C55  | 170.8 (6)  | O10—N4—C78—C79    | -2.2 (10)  |
| O7—N3—C57—C51     | 177.7 (7)  | N4—O10—C80—C79    | -1.6 (10)  |
| O7—N3—C57—C58     | -1.9 (9)   | N4—O10—C80—C81    | 178.5 (8)  |
| N3—O7—C59—C58     | -2.4 (10)  | N4—C78—C79—C80    | 1.3 (11)   |
| N3—O7—C59—C60     | 179.3 (8)  | N4—C78—C79—C82    | -179.6 (9) |
| N3—C57—C58—C59    | 0.5 (10)   | C64—C65—C66—Br18  | 173.7 (7)  |
| N3—C57—C58—C61    | 176.8 (9)  | C64—C65—C66—C67   | 48.2 (11)  |
| C43—C44—C45—Br13  | 174.5 (6)  | C65—C64—C75—C72   | 156.4 (9)  |
| C43—C44—C45—C46   | 51.6 (10)  | C65—C64—C75—C74   | -24.8 (13) |
| C43—C55—C56—C46   | 6.4 (12)   | C65—C66—C67—Br19  | 63.1 (9)   |
| C43—C55—C56—C52   | -174.8 (8) | C65—C66—C67—C74   | -59.5 (11) |
| C44—C43—C55—C51   | 162.2 (8)  | C66—C67—C74—C73   | -146.0 (9) |
| C44—C43—C55—C56   | -19.2 (12) | C66—C67—C74—C75   | 27.3 (12)  |
| C44—C45—C46—Br14  | 59.4 (8)   | C67—C74—C75—C64   | 14.1 (13)  |
| C44—C45—C46—C56   | -64.7 (10) | C67—C74—C75—C72   | -167.1 (9) |
| C45—C46—C56—C52   | -143.6 (9) | C68—C69—C70—C71   | -0.3 (16)  |
| C45—C46—C56—C55   | 35.2 (11)  | C69—C68—C77—C73   | 175.1 (10) |
| C47—C48—C49—C50   | 1.6 (15)   | C69—C68—C77—C76   | -1.1 (15)  |
| C47—C53—C54—C50   | 1.4 (13)   | C69—C70—C71—C76   | 0.2 (16)   |
| C47—C53—C54—C51   | -177.2 (8) | C70—C71—C76—C72   | 178.3 (9)  |
| C48—C47—C53—C52   | 179.2 (9)  | C70—C71—C76—C77   | -0.5 (15)  |
| C48—C47—C53—C54   | -1.2 (14)  | C71—C76—C77—C68   | 0.9 (14)   |
| C48—C49—C50—C54   | -1.4 (15)  | C71—C76—C77—C73   | -175.5 (9) |
| C49—C50—C54—C51   | 178.5 (9)  | C72—C76—C77—C68   | -177.9 (9) |

|                  |             |                   |             |
|------------------|-------------|-------------------|-------------|
| C49—C50—C54—C53  | -0.1 (14)   | C72—C76—C77—C73   | 5.6 (14)    |
| C51—C55—C56—C46  | -175.0 (8)  | C72—C78—C79—C80   | -179.1 (9)  |
| C51—C55—C56—C52  | 3.8 (13)    | C72—C78—C79—C82   | 0.0 (16)    |
| C51—C57—C58—C59  | -179.0 (8)  | C73—C74—C75—C64   | -172.4 (9)  |
| C51—C57—C58—C61  | -2.8 (15)   | C73—C74—C75—C72   | 6.3 (14)    |
| C52—C53—C54—C50  | -179.0 (8)  | C74—C73—C77—C68   | -179.0 (10) |
| C52—C53—C54—C51  | 2.4 (12)    | C74—C73—C77—C76   | -2.8 (15)   |
| C53—C47—C48—C49  | -0.3 (15)   | C75—C64—C65—Br17  | -132.9 (7)  |
| C53—C52—C56—C46  | 172.7 (9)   | C75—C64—C65—C66   | -7.3 (12)   |
| C53—C52—C56—C55  | -6.1 (14)   | C75—C72—C76—C71   | 178.5 (9)   |
| C54—C51—C55—C43  | 180.0 (8)   | C75—C72—C76—C77   | -2.6 (14)   |
| C54—C51—C55—C56  | 1.4 (13)    | C75—C72—C78—N4    | -70.2 (12)  |
| C54—C51—C57—N3   | 114.5 (9)   | C75—C72—C78—C79   | 110.2 (12)  |
| C54—C51—C57—C58  | -66.0 (12)  | C76—C72—C75—C64   | 175.4 (8)   |
| C55—C43—C44—Br12 | -131.6 (7)  | C76—C72—C75—C74   | -3.4 (14)   |
| C55—C43—C44—C45  | -10.3 (11)  | C76—C72—C78—N4    | 110.4 (10)  |
| C55—C51—C54—C50  | 176.9 (9)   | C76—C72—C78—C79   | -69.2 (13)  |
| C55—C51—C54—C53  | -4.5 (13)   | C77—C68—C69—C70   | 0.8 (17)    |
| C55—C51—C57—N3   | -75.3 (11)  | C77—C73—C74—C67   | 170.1 (9)   |
| C55—C51—C57—C58  | 104.2 (11)  | C77—C73—C74—C75   | -3.1 (15)   |
| C56—C52—C53—C47  | -177.4 (9)  | C78—C72—C75—C64   | -4.1 (14)   |
| C56—C52—C53—C54  | 3.0 (13)    | C78—C72—C75—C74   | 177.1 (9)   |
| C57—C51—C54—C50  | -12.8 (13)  | C78—C72—C76—C71   | -2.0 (14)   |
| C57—C51—C54—C53  | 165.7 (8)   | C78—C72—C76—C77   | 176.8 (9)   |
| C57—C51—C55—C43  | 9.9 (13)    | C78—C79—C80—O10   | 0.3 (10)    |
| C57—C51—C55—C56  | -168.7 (8)  | C78—C79—C80—C81   | -179.9 (10) |
| C57—C58—C59—O7   | 1.2 (10)    | C78—C79—C82—O11   | 167.7 (10)  |
| C57—C58—C59—C60  | 179.1 (10)  | C78—C79—C82—O12   | -11.0 (13)  |
| C57—C58—C61—O8   | 176.8 (9)   | C80—O10—N4—C78    | 2.4 (10)    |
| C57—C58—C61—O9   | -5.4 (13)   | C80—C79—C82—O11   | -13.3 (16)  |
| C59—O7—N3—C57    | 2.6 (9)     | C80—C79—C82—O12   | 168.0 (9)   |
| C59—C58—C61—O8   | -7.8 (16)   | C82—O12—C83—C84   | -174.4 (12) |
| C59—C58—C61—O9   | 170.0 (9)   | C82—O12—C83A—C84A | 156 (3)     |
| C61—O9—C62—C63   | -177.0 (10) | C82—C79—C80—O10   | -178.9 (9)  |
| C61—C58—C59—O7   | -175.2 (8)  | C82—C79—C80—C81   | 1.0 (18)    |
| C61—C58—C59—C60  | 2.7 (17)    | C83—O12—C82—O11   | -2.0 (15)   |
| C62—O9—C61—O8    | -0.1 (14)   | C83—O12—C82—C79   | 176.8 (10)  |

|                 |            |                  |          |
|-----------------|------------|------------------|----------|
| C62—O9—C61—C58  | -177.9 (8) | C83A—O12—C82—O11 | 17 (2)   |
| Br6—C22—C23—Br7 | -101.9 (5) | C83A—O12—C82—C79 | -164 (2) |
| Br6—C22—C23—C24 | 135.2 (6)  |                  |          |

**Table S7.** Hydrogen-bond geometry (Å, °) for the Penta bromo AIM ester **2** (cl\_mc79c9\_15\_0m).

| <i>D</i> —H··· <i>A</i> | <i>D</i> —H | H··· <i>A</i> | <i>D</i> ··· <i>A</i> | <i>D</i> —H··· <i>A</i> |
|-------------------------|-------------|---------------|-----------------------|-------------------------|
| C43—H43···N3            | 1.00        | 2.51          | 3.178 (11)            | 124                     |
| C22—H22···N2            | 1.00        | 2.45          | 3.120 (11)            | 124                     |
| C64—H64···N4            | 1.00        | 2.44          | 3.176 (12)            | 130                     |
| C81—H81B···O11          | 0.98        | 2.49          | 3.139 (14)            | 123                     |

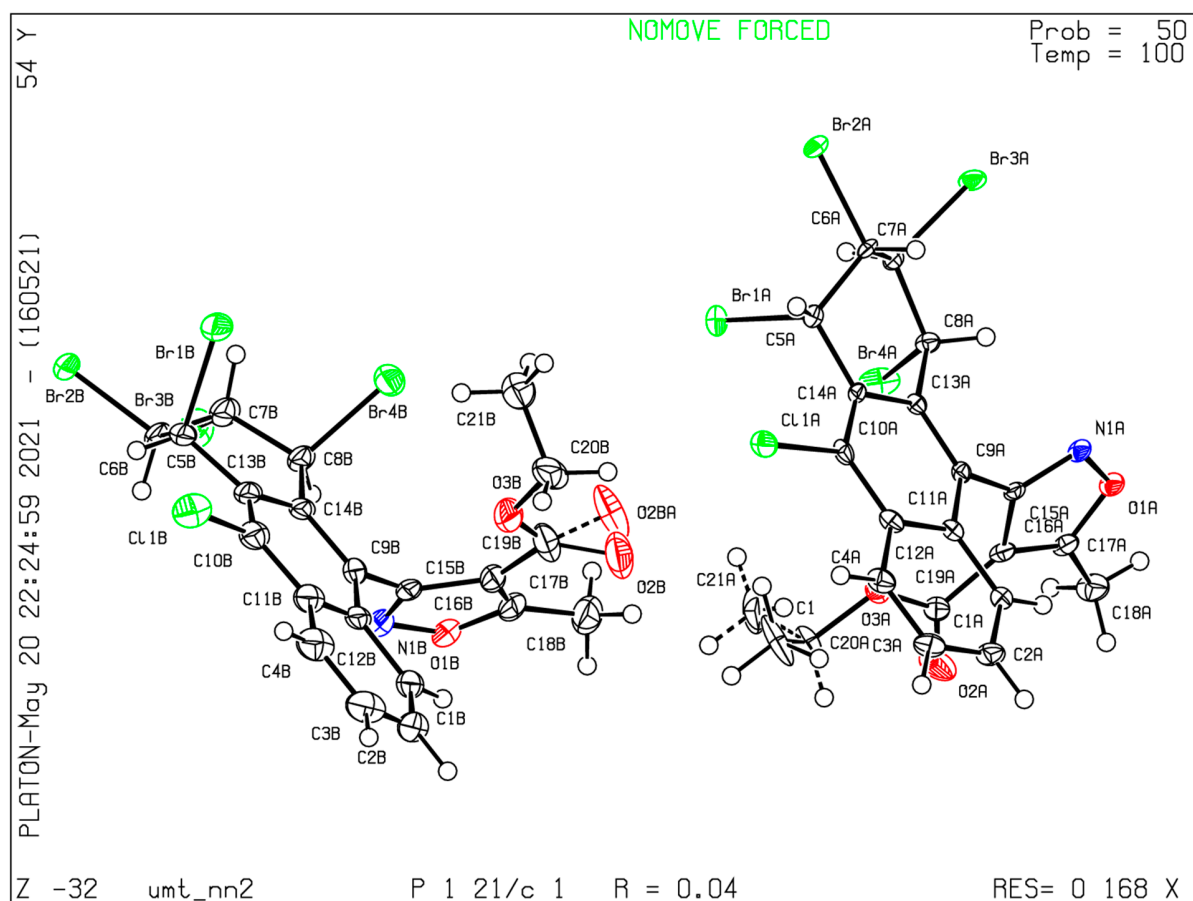

**Figure S8.** Number of the unit cell for tetra bromo chloro AIM **3** (MC221).

**Table S8.** Fractional Atomic Coordinates ( $\times 10^4$ ) and Equivalent Isotropic Displacement Parameters ( $\text{\AA}^2 \times 10^3$ ) for the Tetrabromo Chloro AIM ester **3** (MC221).  $U_{eq}$  is defined as 1/3 of the trace of the orthogonalised  $U_{ij}$  tensor.

| Atom | <i>x</i>   | <i>Y</i>    | <i>z</i>   | <i>U</i> (eq) |
|------|------------|-------------|------------|---------------|
| Br1  | 6547.5(2)  | 13210.1(5)  | 3381.4(3)  | 34.23(13)     |
| Br2  | 5138.5(2)  | 14093.6(5)  | 3118.4(3)  | 32.34(13)     |
| Br3  | 4693.8(2)  | 11596.4(6)  | 4223.0(3)  | 38.26(14)     |
| Br4  | 6288.6(2)  | 10347.8(5)  | 4752.3(3)  | 30.19(12)     |
| Cl1  | 6654.5(6)  | 11505.8(13) | 1588.0(7)  | 36.9(3)       |
| O1   | 5284.6(15) | 6404(3)     | 4233.7(19) | 32.4(8)       |
| O3   | 7057.8(16) | 7645(4)     | 3979(2)    | 44.5(10)      |
| N1   | 5321.3(18) | 7354(4)     | 3690(2)    | 30.8(10)      |
| C1   | 5962.0(19) | 12200(4)    | 2802(3)    | 24.7(10)      |
| C2   | 5399(2)    | 12283(5)    | 3123(3)    | 28.4(11)      |
| C3   | 5437(2)    | 11719(5)    | 3871(3)    | 28.5(11)      |
| C4   | 5703.8(18) | 10347(5)    | 3915(3)    | 23(1)         |
| C5   | 6379(2)    | 6717(5)     | 2419(3)    | 31.0(12)      |
| C6   | 6643(2)    | 6305(5)     | 1844(3)    | 34.8(13)      |
| C7   | 6855(2)    | 7208(6)     | 1371(3)    | 38.7(14)      |
| C8   | 6800(2)    | 8521(6)     | 1474(3)    | 35.3(12)      |
| C9   | 6417.0(18) | 10354(5)    | 2182(3)    | 26.4(10)      |
| C10  | 6049.4(19) | 8547(5)     | 3155(3)    | 24.8(10)      |
| C11  | 6313.3(18) | 8088(5)     | 2550(3)    | 25.3(11)      |
| C12  | 6519.7(19) | 8997(5)     | 2062(3)    | 27.5(11)      |
| C13  | 6134.7(18) | 10796(4)    | 2743(3)    | 23(1)         |
| C14  | 5971.8(18) | 9880(4)     | 3261(3)    | 22.1(10)      |
| C15  | 5863(2)    | 7580(4)     | 3675(3)    | 25.9(11)      |
| C16  | 6192(2)    | 6790(5)     | 4188(3)    | 30.6(12)      |
| C17  | 5808(2)    | 6082(5)     | 4510(3)    | 33.8(12)      |
| C18  | 5841(3)    | 5057(6)     | 5079(3)    | 45.8(15)      |
| C19  | 6808(2)    | 6763(6)     | 4344(3)    | 38.9(14)      |
| C20  | 7668(2)    | 7830(6)     | 4082(3)    | 43.7(15)      |
| C21  | 7786(2)    | 9200(5)     | 4338(3)    | 35.0(12)      |
| O2   | 7026(3)    | 5796(10)    | 4702(4)    | 46(2)         |
| O4   | 7079(7)    | 6476(19)    | 4888(9)    | 46(2)         |
| Br1' | 8449.8(2)  | 7762.9(5)   | 6008.8(3)  | 25.60(11)     |
| Br2' | 9581.4(2)  | 8913.6(4)   | 7165.8(2)  | 17.99(10)     |
| Br3' | 9427.5(2)  | 6514.6(4)   | 8444.3(2)  | 22.40(11)     |
| Br4' | 8072.2(2)  | 4887.5(5)   | 7339.1(3)  | 29.82(12)     |
| Cl09 | 9281.5(5)  | 6112.5(10)  | 4627.4(5)  | 20.3(2)       |
| O1'  | 8788.7(12) | 1104(3)     | 7887.7(15) | 17.4(6)       |
| O2'  | 7490.1(14) | 755(4)      | 6176.9(18) | 33.2(8)       |
| O3'  | 7941.6(12) | 2519(3)     | 5790.5(16) | 18.9(6)       |
| N1'  | 9119.9(15) | 2020(3)     | 7541.3(18) | 15.0(7)       |
| C1'  | 9190.4(17) | 6899(4)     | 6173(2)    | 15.9(8)       |

|      |            |          |          |          |
|------|------------|----------|----------|----------|
| C2'  | 9442.3(18) | 7069(4)  | 6949(2)  | 14.4(8)  |
| C3'  | 9061.9(18) | 6471(4)  | 7466(2)  | 15.3(8)  |
| C4'  | 8891.4(17) | 5038(4)  | 7274(2)  | 13.9(8)  |
| C5'  | 9209.8(17) | 1378(4)  | 5583(2)  | 15.9(8)  |
| C6'  | 9326.9(18) | 934(4)   | 4921(2)  | 20.2(9)  |
| C7'  | 9407.6(18) | 1833(5)  | 4368(2)  | 20.1(9)  |
| C8'  | 9377.3(17) | 3150(4)  | 4485(2)  | 17.6(9)  |
| C9'  | 9228.2(16) | 5000(4)  | 5324(2)  | 13.7(8)  |
| C10' | 9035.0(16) | 3223(4)  | 6403(2)  | 11.0(8)  |
| C11' | 9173.9(16) | 2734(4)  | 5725(2)  | 12.3(8)  |
| C12' | 9260.9(16) | 3639(4)  | 5166(2)  | 14.6(8)  |
| C13' | 9146.3(16) | 5468(4)  | 5997(2)  | 11.4(8)  |
| C14' | 9031.4(16) | 4550(4)  | 6549(2)  | 10.9(8)  |
| C15' | 8831.2(17) | 2264(4)  | 6925(2)  | 12.2(8)  |
| C16' | 8321.8(17) | 1526(4)  | 6837(2)  | 15.4(8)  |
| C17' | 8322.6(18) | 819(4)   | 7457(2)  | 15.7(8)  |
| C18' | 7938(2)    | -151(5)  | 7735(2)  | 26.1(10) |
| C19' | 7871.1(18) | 1542(4)  | 6243(2)  | 17.5(9)  |
| C20' | 7544.0(19) | 2652(5)  | 5150(2)  | 25.4(10) |
| C21' | 7875(5)    | 3210(20) | 4557(7)  | 50(4)    |
| C22' | 7776(15)   | 3760(40) | 4740(20) | 50(4)    |

| <b>Table S9.</b> Anisotropic Displacement Parameters ( $\text{\AA}^2 \times 10^3$ ) for the Tetrabromo Chloro AIM ester <b>3</b> (MC221). The Anisotropic displacement factor exponent takes the form: - $2\pi^2[h^2a^{*2}U_{11}+2hka^*b^*U_{12}+\dots]$ . |                 |                 |                 |                 |                 |                 |
|------------------------------------------------------------------------------------------------------------------------------------------------------------------------------------------------------------------------------------------------------------|-----------------|-----------------|-----------------|-----------------|-----------------|-----------------|
| Atom                                                                                                                                                                                                                                                       | U <sub>11</sub> | U <sub>22</sub> | U <sub>33</sub> | U <sub>23</sub> | U <sub>13</sub> | U <sub>12</sub> |
| Br1                                                                                                                                                                                                                                                        | 30.0(3)         | 22.5(3)         | 47.5(3)         | -3.4(2)         | -11.1(2)        | -3.7(2)         |
| Br2                                                                                                                                                                                                                                                        | 33.3(3)         | 17.4(2)         | 42.9(3)         | -7.8(2)         | -14.4(2)        | 9.2(2)          |
| Br3                                                                                                                                                                                                                                                        | 30.0(3)         | 41.9(3)         | 43.3(3)         | -4.9(3)         | 5.6(2)          | 16.1(2)         |
| Br4                                                                                                                                                                                                                                                        | 28.6(3)         | 32.7(3)         | 28.3(3)         | -4.2(2)         | -2.8(2)         | 5.6(2)          |
| Cl1                                                                                                                                                                                                                                                        | 35.6(7)         | 34.0(7)         | 42.0(7)         | -5.1(6)         | 7.6(6)          | -2.7(6)         |
| O1                                                                                                                                                                                                                                                         | 46(2)           | 15.9(17)        | 33(2)           | -2.2(15)        | -6.2(16)        | 2.4(15)         |
| O3                                                                                                                                                                                                                                                         | 34(2)           | 26(2)           | 69(3)           | 0(2)            | -25(2)          | 3.3(17)         |
| N1                                                                                                                                                                                                                                                         | 38(2)           | 16(2)           | 36(2)           | 0.3(18)         | -11.8(19)       | 0.2(17)         |
| C1                                                                                                                                                                                                                                                         | 24(2)           | 17(2)           | 30(3)           | -8(2)           | -10(2)          | -0.9(19)        |
| C2                                                                                                                                                                                                                                                         | 24(2)           | 17(2)           | 43(3)           | -7(2)           | -8(2)           | 6.5(19)         |
| C3                                                                                                                                                                                                                                                         | 22(2)           | 23(3)           | 39(3)           | -9(2)           | -2(2)           | 6(2)            |
| C4                                                                                                                                                                                                                                                         | 18(2)           | 19(2)           | 31(3)           | -7.6(19)        | -2.7(19)        | 5.2(18)         |
| C5                                                                                                                                                                                                                                                         | 24(2)           | 26(3)           | 40(3)           | -10(2)          | -12(2)          | 11(2)           |
| C6                                                                                                                                                                                                                                                         | 24(3)           | 30(3)           | 48(3)           | -18(3)          | -9(2)           | 16(2)           |
| C7                                                                                                                                                                                                                                                         | 23(3)           | 48(3)           | 45(3)           | -22(3)          | -1(2)           | 10(2)           |
| C8                                                                                                                                                                                                                                                         | 20(2)           | 43(3)           | 42(3)           | -13(3)          | 1(2)            | 4(2)            |
| C9                                                                                                                                                                                                                                                         | 16(2)           | 28(3)           | 34(3)           | -5(2)           | -4.1(19)        | 1.0(19)         |
| C10                                                                                                                                                                                                                                                        | 19(2)           | 21(2)           | 32(3)           | -5(2)           | -9.3(19)        | 5.7(18)         |
| C11                                                                                                                                                                                                                                                        | 16(2)           | 23(2)           | 35(3)           | -12(2)          | -11.5(19)       | 8.6(18)         |

|      |          |          |          |           |           |           |
|------|----------|----------|----------|-----------|-----------|-----------|
| C12  | 16(2)    | 31(3)    | 35(3)    | -9(2)     | -4.0(19)  | 5(2)      |
| C13  | 19(2)    | 18(2)    | 31(3)    | -8.9(19)  | -6.6(19)  | 1.1(18)   |
| C14  | 19(2)    | 18(2)    | 28(2)    | -7.6(19)  | -8.1(18)  | 4.3(18)   |
| C15  | 30(3)    | 15(2)    | 31(3)    | -10.9(19) | -10(2)    | 8.6(19)   |
| C16  | 43(3)    | 22(3)    | 24(3)    | -7(2)     | -6(2)     | 15(2)     |
| C17  | 50(3)    | 22(3)    | 28(3)    | -9(2)     | -6(2)     | 17(2)     |
| C18  | 70(4)    | 33(3)    | 34(3)    | 0(2)      | -2(3)     | 22(3)     |
| C19  | 40(3)    | 54(4)    | 21(3)    | -8(3)     | -7(2)     | 29(3)     |
| C20  | 29(3)    | 48(4)    | 50(4)    | -22(3)    | -16(3)    | 17(3)     |
| C21  | 29(3)    | 41(3)    | 34(3)    | 5(2)      | 1(2)      | 0(2)      |
| O2   | 42(3)    | 52(6)    | 42(4)    | 17(4)     | 0(3)      | 23(4)     |
| O4   | 42(3)    | 52(6)    | 42(4)    | 17(4)     | 0(3)      | 23(4)     |
| Br1' | 27.3(2)  | 21.2(2)  | 26.5(2)  | 2.62(19)  | -7.37(19) | 7.77(19)  |
| Br2' | 25.2(2)  | 7.72(19) | 20.6(2)  | -0.16(16) | -0.37(17) | -1.26(16) |
| Br3' | 43.5(3)  | 12.5(2)  | 10.5(2)  | -2.37(16) | -1.61(18) | -2.36(19) |
| Br4' | 23.1(2)  | 31.2(3)  | 37.4(3)  | -13.5(2)  | 14.7(2)   | -7.3(2)   |
| Cl09 | 31.2(6)  | 19.1(5)  | 10.3(5)  | 5.5(4)    | 0.3(4)    | -6.2(4)   |
| O1'  | 26.7(16) | 12.9(14) | 12.9(14) | 3.5(12)   | 2.9(12)   | -4.3(12)  |
| O2'  | 29.0(18) | 40(2)    | 29.1(19) | 7.8(16)   | -5.3(15)  | -21.0(16) |
| O3'  | 21.4(15) | 16.5(15) | 17.6(15) | 4.2(12)   | -4.9(12)  | -3.1(12)  |
| N1'  | 23.7(18) | 8.0(16)  | 13.3(17) | 2.7(13)   | 1.8(14)   | -2.9(14)  |
| C1'  | 20(2)    | 12(2)    | 15(2)    | 3.0(16)   | -1.9(16)  | -0.1(16)  |
| C2'  | 23(2)    | 3.5(18)  | 16(2)    | -0.1(15)  | -1.5(17)  | -0.8(16)  |
| C3'  | 22(2)    | 11(2)    | 12(2)    | -0.7(16)  | 0.3(16)   | 1.7(16)   |
| C4'  | 17(2)    | 12(2)    | 13(2)    | -1.2(16)  | 4.2(16)   | -2.1(16)  |
| C5'  | 16(2)    | 15(2)    | 16(2)    | -0.6(17)  | -0.9(16)  | 1.5(16)   |
| C6'  | 23(2)    | 18(2)    | 19(2)    | -7.6(18)  | 1.3(18)   | 0.8(18)   |
| C7'  | 21(2)    | 28(2)    | 12(2)    | -6.2(18)  | 2.6(17)   | -0.9(19)  |
| C8'  | 20(2)    | 23(2)    | 10(2)    | 0.6(17)   | 3.4(16)   | -4.6(18)  |
| C9'  | 15(2)    | 17(2)    | 9.2(19)  | 6.2(16)   | -0.1(15)  | -3.6(16)  |
| C10' | 10.7(18) | 12.6(19) | 9.9(19)  | 3.2(15)   | 1.0(15)   | -2.7(15)  |
| C11' | 10.3(18) | 15(2)    | 11.2(19) | 0.7(16)   | -1.5(15)  | -0.5(15)  |
| C12' | 8.9(18)  | 22(2)    | 13(2)    | -0.8(17)  | -0.2(15)  | -3.1(16)  |
| C13' | 12.8(19) | 7.7(18)  | 13.1(19) | 1.7(15)   | -1.9(15)  | 0.7(15)   |
| C14' | 11.3(18) | 13.4(19) | 8.0(18)  | 0.5(15)   | 0.6(15)   | -0.3(15)  |
| C15' | 20(2)    | 7.0(18)  | 10.0(19) | -3.1(15)  | 1.7(16)   | 2.1(15)   |
| C16' | 22(2)    | 9.5(19)  | 15(2)    | -1.8(16)  | 3.6(16)   | -2.8(16)  |
| C17' | 24(2)    | 8.9(19)  | 15(2)    | -2.1(16)  | 3.6(17)   | -1.7(17)  |
| C18' | 38(3)    | 20(2)    | 21(2)    | 4.0(19)   | 4(2)      | -10(2)    |
| C19' | 20(2)    | 18(2)    | 15(2)    | -2.0(17)  | 1.5(16)   | 1.0(18)   |
| C20' | 17(2)    | 37(3)    | 20(2)    | 8(2)      | -5.9(18)  | -3(2)     |
| C21' | 27(5)    | 96(11)   | 23(5)    | 22(6)     | -10(3)    | -5(6)     |
| C22' | 27(5)    | 96(11)   | 23(5)    | 22(6)     | -10(3)    | -5(6)     |

**Table S10.** Bond Lengths for the Tetrabromo Chloro AIM ester **3** (MC221).

| Atom | Atom | Length/Å |  | Atom | Atom | Length/Å |
|------|------|----------|--|------|------|----------|
|------|------|----------|--|------|------|----------|

|     |     |           |  |      |      |           |
|-----|-----|-----------|--|------|------|-----------|
| Br1 | C1  | 1.977(4)  |  | Br1' | C1'  | 1.975(4)  |
| Br2 | C2  | 1.945(5)  |  | Br2' | C2'  | 1.942(4)  |
| Br3 | C3  | 1.953(5)  |  | Br3' | C3'  | 1.952(4)  |
| Br4 | C4  | 1.999(4)  |  | Br4' | C4'  | 1.979(4)  |
| Cl1 | C9  | 1.743(5)  |  | Cl09 | C9'  | 1.738(4)  |
| O1  | N1  | 1.409(5)  |  | O1'  | N1'  | 1.416(4)  |
| O1  | C17 | 1.350(6)  |  | O1'  | C17' | 1.344(5)  |
| O3  | C19 | 1.303(7)  |  | O2'  | C19' | 1.210(5)  |
| O3  | C20 | 1.465(6)  |  | O3'  | C19' | 1.325(5)  |
| N1  | C15 | 1.318(6)  |  | O3'  | C20' | 1.464(5)  |
| C1  | C2  | 1.523(7)  |  | N1'  | C15' | 1.309(5)  |
| C1  | C13 | 1.494(6)  |  | C1'  | C2'  | 1.526(6)  |
| C2  | C3  | 1.505(7)  |  | C1'  | C13' | 1.494(6)  |
| C3  | C4  | 1.535(6)  |  | C2'  | C3'  | 1.512(6)  |
| C4  | C14 | 1.506(6)  |  | C3'  | C4'  | 1.547(6)  |
| C5  | C6  | 1.360(7)  |  | C4'  | C14' | 1.507(5)  |
| C5  | C11 | 1.427(7)  |  | C5'  | C6'  | 1.369(6)  |
| C6  | C7  | 1.399(8)  |  | C5'  | C11' | 1.409(6)  |
| C7  | C8  | 1.358(8)  |  | C6'  | C7'  | 1.404(6)  |
| C8  | C12 | 1.421(7)  |  | C7'  | C8'  | 1.361(6)  |
| C9  | C12 | 1.423(7)  |  | C8'  | C12' | 1.416(6)  |
| C9  | C13 | 1.373(7)  |  | C9'  | C12' | 1.419(6)  |
| C10 | C11 | 1.421(7)  |  | C9'  | C13' | 1.374(6)  |
| C10 | C14 | 1.385(6)  |  | C10' | C11' | 1.427(5)  |
| C10 | C15 | 1.479(7)  |  | C10' | C14' | 1.378(6)  |
| C11 | C12 | 1.418(7)  |  | C10' | C15' | 1.492(5)  |
| C13 | C14 | 1.423(7)  |  | C11' | C12' | 1.421(6)  |
| C15 | C16 | 1.429(7)  |  | C13' | C14' | 1.434(5)  |
| C16 | C17 | 1.350(8)  |  | C15' | C16' | 1.427(6)  |
| C16 | C19 | 1.476(8)  |  | C16' | C17' | 1.362(6)  |
| C17 | C18 | 1.485(8)  |  | C16' | C19' | 1.473(6)  |
| C19 | O2  | 1.273(9)  |  | C17' | C18' | 1.475(6)  |
| C19 | O4  | 1.188(16) |  | C20' | C21' | 1.526(9)  |
| C20 | C21 | 1.492(8)  |  | C20' | C22' | 1.503(17) |

| Table S11. Bond Angles for the Tetrabromo Chloro AIM ester <b>3</b> (MC221). |      |      |          |  |      |      |      |          |
|------------------------------------------------------------------------------|------|------|----------|--|------|------|------|----------|
| Atom                                                                         | Atom | Atom | Angle/°  |  | Atom | Atom | Atom | Angle/°  |
| C17                                                                          | O1   | N1   | 108.9(4) |  | C17' | O1'  | N1'  | 109.7(3) |
| C19                                                                          | O3   | C20  | 121.1(4) |  | C19' | O3'  | C20' | 118.7(3) |
| C15                                                                          | N1   | O1   | 105.2(4) |  | C15' | N1'  | O1'  | 104.7(3) |
| C2                                                                           | C1   | Br1  | 111.3(3) |  | C2'  | C1'  | Br1' | 111.5(3) |
| C13                                                                          | C1   | Br1  | 110.5(3) |  | C13' | C1'  | Br1' | 110.8(3) |
| C13                                                                          | C1   | C2   | 110.0(4) |  | C13' | C1'  | C2'  | 109.4(3) |
| C1                                                                           | C2   | Br2  | 110.2(3) |  | C1'  | C2'  | Br2' | 110.6(3) |

|     |     |     |           |  |      |      |      |           |
|-----|-----|-----|-----------|--|------|------|------|-----------|
| C3  | C2  | Br2 | 110.9(3)  |  | C3'  | C2'  | Br2' | 111.0(3)  |
| C3  | C2  | C1  | 111.4(4)  |  | C3'  | C2'  | C1'  | 110.5(3)  |
| C2  | C3  | Br3 | 111.0(3)  |  | C2'  | C3'  | Br3' | 110.1(3)  |
| C2  | C3  | C4  | 112.6(4)  |  | C2'  | C3'  | C4'  | 113.2(3)  |
| C4  | C3  | Br3 | 108.1(3)  |  | C4'  | C3'  | Br3' | 108.9(3)  |
| C3  | C4  | Br4 | 107.4(3)  |  | C3'  | C4'  | Br4' | 107.5(3)  |
| C14 | C4  | Br4 | 108.3(3)  |  | C14' | C4'  | Br4' | 109.4(3)  |
| C14 | C4  | C3  | 116.7(4)  |  | C14' | C4'  | C3'  | 116.3(3)  |
| C6  | C5  | C11 | 120.2(5)  |  | C6'  | C5'  | C11' | 120.9(4)  |
| C5  | C6  | C7  | 121.0(5)  |  | C5'  | C6'  | C7'  | 120.1(4)  |
| C8  | C7  | C6  | 120.8(5)  |  | C8'  | C7'  | C6'  | 120.6(4)  |
| C7  | C8  | C12 | 120.2(6)  |  | C7'  | C8'  | C12' | 120.6(4)  |
| C12 | C9  | C11 | 118.8(4)  |  | C12' | C9'  | C109 | 118.1(3)  |
| C13 | C9  | C11 | 118.4(4)  |  | C13' | C9'  | C109 | 119.0(3)  |
| C13 | C9  | C12 | 122.8(5)  |  | C13' | C9'  | C12' | 122.9(4)  |
| C11 | C10 | C15 | 119.0(4)  |  | C11' | C10' | C15' | 117.9(3)  |
| C14 | C10 | C11 | 120.7(5)  |  | C14' | C10' | C11' | 121.5(4)  |
| C14 | C10 | C15 | 120.3(4)  |  | C14' | C10' | C15' | 120.2(3)  |
| C10 | C11 | C5  | 121.5(5)  |  | C5'  | C11' | C10' | 122.1(4)  |
| C12 | C11 | C5  | 118.5(5)  |  | C5'  | C11' | C12' | 118.8(4)  |
| C12 | C11 | C10 | 120.1(4)  |  | C12' | C11' | C10' | 119.1(4)  |
| C8  | C12 | C9  | 123.5(5)  |  | C8'  | C12' | C9'  | 123.3(4)  |
| C11 | C12 | C8  | 119.3(5)  |  | C8'  | C12' | C11' | 119.0(4)  |
| C11 | C12 | C9  | 117.2(4)  |  | C9'  | C12' | C11' | 117.7(4)  |
| C9  | C13 | C1  | 121.9(5)  |  | C9'  | C13' | C1'  | 121.7(4)  |
| C9  | C13 | C14 | 119.2(4)  |  | C9'  | C13' | C14' | 118.8(4)  |
| C14 | C13 | C1  | 118.8(4)  |  | C14' | C13' | C1'  | 119.4(4)  |
| C10 | C14 | C4  | 119.8(4)  |  | C10' | C14' | C4'  | 120.4(3)  |
| C10 | C14 | C13 | 119.7(4)  |  | C10' | C14' | C13' | 119.5(4)  |
| C13 | C14 | C4  | 120.5(4)  |  | C13' | C14' | C4'  | 120.1(3)  |
| N1  | C15 | C10 | 119.1(4)  |  | N1'  | C15' | C10' | 121.4(4)  |
| N1  | C15 | C16 | 111.6(5)  |  | N1'  | C15' | C16' | 112.1(4)  |
| C16 | C15 | C10 | 129.3(5)  |  | C16' | C15' | C10' | 126.5(4)  |
| C15 | C16 | C19 | 128.4(5)  |  | C15' | C16' | C19' | 129.7(4)  |
| C17 | C16 | C15 | 104.1(5)  |  | C17' | C16' | C15' | 104.2(4)  |
| C17 | C16 | C19 | 127.5(5)  |  | C17' | C16' | C19' | 126.0(4)  |
| O1  | C17 | C16 | 110.1(4)  |  | O1'  | C17' | C16' | 109.3(4)  |
| O1  | C17 | C18 | 115.4(5)  |  | O1'  | C17' | C18' | 116.3(4)  |
| C16 | C17 | C18 | 134.4(5)  |  | C16' | C17' | C18' | 134.4(4)  |
| O3  | C19 | C16 | 112.4(4)  |  | O2'  | C19' | O3'  | 124.7(4)  |
| O2  | C19 | O3  | 128.5(6)  |  | O2'  | C19' | C16' | 124.1(4)  |
| O2  | C19 | C16 | 118.0(7)  |  | O3'  | C19' | C16' | 111.2(4)  |
| O4  | C19 | O3  | 112.1(10) |  | O3'  | C20' | C21' | 106.6(5)  |
| O4  | C19 | C16 | 128.9(10) |  | O3'  | C20' | C22' | 104.3(13) |
| O3  | C20 | C21 | 108.7(4)  |  |      |      |      |           |

| <b>Table S12.</b> Torsion Angles for the Tetrabromo Chloro AIM ester <b>3</b> (MC221). |          |          |          |                |  |          |          |          |          |                |
|----------------------------------------------------------------------------------------|----------|----------|----------|----------------|--|----------|----------|----------|----------|----------------|
| <b>A</b>                                                                               | <b>B</b> | <b>C</b> | <b>D</b> | <b>Angle/°</b> |  | <b>A</b> | <b>B</b> | <b>C</b> | <b>D</b> | <b>Angle/°</b> |
| Br1                                                                                    | C1       | C2       | Br2      | 62.4(4)        |  | C20      | O3       | C19      | O4       | 22.6(12)       |
| Br1                                                                                    | C1       | C2       | C3       | -61.0(4)       |  | Br1'     | C1'      | C2'      | Br2'     | -63.2(3)       |
| Br1                                                                                    | C1       | C13      | C9       | -92.1(5)       |  | Br1'     | C1'      | C2'      | C3'      | 60.2(4)        |
| Br1                                                                                    | C1       | C13      | C14      | 91.7(4)        |  | Br1'     | C1'      | C13'     | C9'      | 91.9(4)        |
| Br2                                                                                    | C2       | C3       | Br3      | 65.1(4)        |  | Br1'     | C1'      | C13'     | C14'     | -89.9(4)       |
| Br2                                                                                    | C2       | C3       | C4       | -173.5(3)      |  | Br2'     | C2'      | C3'      | Br3'     | -63.4(3)       |
| Br3                                                                                    | C3       | C4       | Br4      | -105.1(3)      |  | Br2'     | C2'      | C3'      | C4'      | 174.5(3)       |
| Br3                                                                                    | C3       | C4       | C14      | 133.1(4)       |  | Br3'     | C3'      | C4'      | Br4'     | 103.3(2)       |
| Br4                                                                                    | C4       | C14      | C10      | 80.4(5)        |  | Br3'     | C3'      | C4'      | C14'     | -133.8(3)      |
| Br4                                                                                    | C4       | C14      | C13      | -101.0(4)      |  | Br4'     | C4'      | C14'     | C10'     | -75.2(4)       |
| Cl1                                                                                    | C9       | C12      | C8       | -1.1(6)        |  | Br4'     | C4'      | C14'     | C13'     | 103.0(4)       |
| Cl1                                                                                    | C9       | C12      | C11      | -179.1(3)      |  | Cl09     | C9'      | C12'     | C8'      | 5.0(5)         |
| Cl1                                                                                    | C9       | C13      | C1       | 8.1(6)         |  | Cl09     | C9'      | C12'     | C11'     | -175.3(3)      |
| Cl1                                                                                    | C9       | C13      | C14      | -175.7(3)      |  | Cl09     | C9'      | C13'     | C1'      | -9.6(5)        |
| O1                                                                                     | N1       | C15      | C10      | -179.9(4)      |  | Cl09     | C9'      | C13'     | C14'     | 172.2(3)       |
| O1                                                                                     | N1       | C15      | C16      | 0.9(5)         |  | O1'      | N1'      | C15'     | C10'     | 178.5(3)       |
| N1                                                                                     | O1       | C17      | C16      | 1.2(5)         |  | O1'      | N1'      | C15'     | C16'     | -1.2(4)        |
| N1                                                                                     | O1       | C17      | C18      | -178.3(4)      |  | N1'      | O1'      | C17'     | C16'     | -1.1(4)        |
| N1                                                                                     | C15      | C16      | C17      | -0.2(5)        |  | N1'      | O1'      | C17'     | C18'     | 178.6(3)       |
| N1                                                                                     | C15      | C16      | C19      | -179.2(5)      |  | N1'      | C15'     | C16'     | C17'     | 0.6(5)         |
| C1                                                                                     | C2       | C3       | Br3      | -171.8(3)      |  | N1'      | C15'     | C16'     | C19'     | 177.5(4)       |
| C1                                                                                     | C2       | C3       | C4       | -50.4(5)       |  | C1'      | C2'      | C3'      | Br3'     | 173.5(3)       |
| C1                                                                                     | C13      | C14      | C4       | -8.7(6)        |  | C1'      | C2'      | C3'      | C4'      | 51.4(4)        |
| C1                                                                                     | C13      | C14      | C10      | 169.9(4)       |  | C1'      | C13'     | C14'     | C4'      | 6.9(5)         |
| C2                                                                                     | C1       | C13      | C9       | 144.6(4)       |  | C1'      | C13'     | C14'     | C10'     | -174.9(4)      |
| C2                                                                                     | C1       | C13      | C14      | -31.6(6)       |  | C2'      | C1'      | C13'     | C9'      | -144.7(4)      |
| C2                                                                                     | C3       | C4       | Br4      | 131.9(4)       |  | C2'      | C1'      | C13'     | C14'     | 33.5(5)        |
| C2                                                                                     | C3       | C4       | C14      | 10.1(6)        |  | C2'      | C3'      | C4'      | Br4'     | -133.9(3)      |
| C3                                                                                     | C4       | C14      | C10      | -158.3(4)      |  | C2'      | C3'      | C4'      | C14'     | -11.0(5)       |
| C3                                                                                     | C4       | C14      | C13      | 20.3(6)        |  | C3'      | C4'      | C14'     | C10'     | 162.9(4)       |
| C5                                                                                     | C6       | C7       | C8       | -0.2(8)        |  | C3'      | C4'      | C14'     | C13'     | -18.9(5)       |
| C5                                                                                     | C11      | C12      | C8       | -2.0(6)        |  | C5'      | C6'      | C7'      | C8'      | 0.8(7)         |
| C5                                                                                     | C11      | C12      | C9       | 176.2(4)       |  | C5'      | C11'     | C12'     | C8'      | 0.4(6)         |
| C6                                                                                     | C5       | C11      | C10      | -178.7(4)      |  | C5'      | C11'     | C12'     | C9'      | -179.4(4)      |
| C6                                                                                     | C5       | C11      | C12      | 1.1(7)         |  | C6'      | C5'      | C11'     | C10'     | 178.0(4)       |
| C6                                                                                     | C7       | C8       | C12      | -0.7(8)        |  | C6'      | C5'      | C11'     | C12'     | 0.1(6)         |
| C7                                                                                     | C8       | C12      | C9       | -176.3(5)      |  | C6'      | C7'      | C8'      | C12'     | -0.3(7)        |
| C7                                                                                     | C8       | C12      | C11      | 1.8(7)         |  | C7'      | C8'      | C12'     | C9'      | 179.5(4)       |
| C9                                                                                     | C13      | C14      | C4       | 175.0(4)       |  | C7'      | C8'      | C12'     | C11'     | -0.3(6)        |
| C9                                                                                     | C13      | C14      | C10      | -6.4(6)        |  | C9'      | C13'     | C14'     | C4'      | -174.8(4)      |
| C10                                                                                    | C11      | C12      | C8       | 177.9(4)       |  | C9'      | C13'     | C14'     | C10'     | 3.4(6)         |
| C10                                                                                    | C11      | C12      | C9       | -4.0(6)        |  | C10'     | C11'     | C12'     | C8'      | -177.6(4)      |
| C10                                                                                    | C15      | C16      | C17      | -179.2(5)      |  | C10'     | C11'     | C12'     | C9'      | 2.7(6)         |

|     |     |     |     |           |  |      |      |      |      |            |
|-----|-----|-----|-----|-----------|--|------|------|------|------|------------|
| C10 | C15 | C16 | C19 | 1.9(8)    |  | C10' | C15' | C16' | C17' | -179.1(4)  |
| C11 | C5  | C6  | C7  | 0.0(7)    |  | C10' | C15' | C16' | C19' | -2.1(7)    |
| C11 | C10 | C14 | C4  | -178.5(4) |  | C11' | C5'  | C6'  | C7'  | -0.6(6)    |
| C11 | C10 | C14 | C13 | 2.9(7)    |  | C11' | C10' | C14' | C4'  | -179.1(4)  |
| C11 | C10 | C15 | N1  | -107.7(5) |  | C11' | C10' | C14' | C13' | 2.7(6)     |
| C11 | C10 | C15 | C16 | 71.2(6)   |  | C11' | C10' | C15' | N1'  | 115.2(4)   |
| C12 | C9  | C13 | C1  | -171.4(4) |  | C11' | C10' | C15' | C16' | -65.1(5)   |
| C12 | C9  | C13 | C14 | 4.8(7)    |  | C12' | C9'  | C13' | C1'  | 171.6(4)   |
| C13 | C1  | C2  | Br2 | -174.7(3) |  | C12' | C9'  | C13' | C14' | -6.6(6)    |
| C13 | C1  | C2  | C3  | 61.8(5)   |  | C13' | C1'  | C2'  | Br2' | 173.9(3)   |
| C13 | C9  | C12 | C8  | 178.5(4)  |  | C13' | C1'  | C2'  | C3'  | -62.8(4)   |
| C13 | C9  | C12 | C11 | 0.4(7)    |  | C13' | C9'  | C12' | C8'  | -176.2(4)  |
| C14 | C10 | C11 | C5  | -177.8(4) |  | C13' | C9'  | C12' | C11' | 3.5(6)     |
| C14 | C10 | C11 | C12 | 2.4(7)    |  | C14' | C10' | C11' | C5'  | 176.4(4)   |
| C14 | C10 | C15 | N1  | 72.9(6)   |  | C14' | C10' | C11' | C12' | -5.7(6)    |
| C14 | C10 | C15 | C16 | -108.2(6) |  | C14' | C10' | C15' | N1'  | -71.3(5)   |
| C15 | C10 | C11 | C5  | 2.8(6)    |  | C14' | C10' | C15' | C16' | 108.3(5)   |
| C15 | C10 | C11 | C12 | -177.0(4) |  | C15' | C10' | C11' | C5'  | -10.3(6)   |
| C15 | C10 | C14 | C4  | 0.9(6)    |  | C15' | C10' | C11' | C12' | 167.6(3)   |
| C15 | C10 | C14 | C13 | -177.7(4) |  | C15' | C10' | C14' | C4'  | 7.7(6)     |
| C15 | C16 | C17 | O1  | -0.6(5)   |  | C15' | C10' | C14' | C13' | -170.5(3)  |
| C15 | C16 | C17 | C18 | 178.8(5)  |  | C15' | C16' | C17' | O1'  | 0.4(4)     |
| C15 | C16 | C19 | O3  | 4.1(7)    |  | C15' | C16' | C17' | C18' | -179.3(5)  |
| C15 | C16 | C19 | O2  | -164.8(7) |  | C15' | C16' | C19' | O2'  | 170.1(4)   |
| C15 | C16 | C19 | O4  | 152.8(14) |  | C15' | C16' | C19' | O3'  | -9.3(6)    |
| C17 | O1  | N1  | C15 | -1.3(5)   |  | C17' | O1'  | N1'  | C15' | 1.4(4)     |
| C17 | C16 | C19 | O3  | -174.6(5) |  | C17' | C16' | C19' | O2'  | -13.5(7)   |
| C17 | C16 | C19 | O2  | 16.5(9)   |  | C17' | C16' | C19' | O3'  | 167.1(4)   |
| C17 | C16 | C19 | O4  | -25.9(16) |  | C19' | O3'  | C20' | C21' | -147.3(10) |
| C19 | O3  | C20 | C21 | -119.0(6) |  | C19' | O3'  | C20' | C22' | -175(2)    |
| C19 | C16 | C17 | O1  | 178.3(4)  |  | C19' | C16' | C17' | O1'  | -176.8(4)  |
| C19 | C16 | C17 | C18 | -2.3(9)   |  | C19' | C16' | C17' | C18' | 3.6(8)     |
| C20 | O3  | C19 | C16 | 176.8(4)  |  | C20' | O3'  | C19' | O2'  | -1.8(6)    |
| C20 | O3  | C19 | O2  | -15.8(10) |  | C20' | O3'  | C19' | C16' | 177.6(4)   |

**Table S13.** Hydrogen Atom Coordinates ( $\text{\AA} \times 10^4$ ) and Isotropic Displacement Parameters ( $\text{\AA}^2 \times 10^3$ ) for the Tetrabromo Chloro AIM ester **3** (MC221).

| Atom | <i>x</i> | <i>y</i> | <i>z</i> | U(eq) |
|------|----------|----------|----------|-------|
| H1   | 5916     | 12585    | 2307     | 30    |
| H2   | 5120     | 11753    | 2813     | 34    |
| H3   | 5673     | 12320    | 4198     | 34    |
| H4   | 5406     | 9699     | 4017     | 28    |
| H5   | 6238     | 6090     | 2734     | 37    |

|      |      |      |      |    |
|------|------|------|------|----|
| H6   | 6685 | 5390 | 1762 | 42 |
| H7   | 7039 | 6899 | 974  | 46 |
| H8   | 6948 | 9124 | 1152 | 42 |
| H18D | 5767 | 5456 | 5539 | 69 |
| H18E | 6217 | 4664 | 5122 | 69 |
| H18F | 5560 | 4375 | 4950 | 69 |
| H20E | 7835 | 7680 | 3623 | 52 |
| H20F | 7836 | 7194 | 4441 | 52 |
| H21D | 7606 | 9823 | 3988 | 53 |
| H21E | 8193 | 9350 | 4387 | 53 |
| H21F | 7637 | 9326 | 4805 | 53 |
| H1'  | 9450 | 7315 | 5848 | 19 |
| H2'  | 9810 | 6595 | 7006 | 17 |
| H3'  | 8712 | 7013 | 7452 | 18 |
| H4'  | 9084 | 4452 | 7649 | 17 |
| H5'  | 9152 | 763  | 5953 | 19 |
| H6'  | 9354 | 17   | 4834 | 24 |
| H7'  | 9484 | 1518 | 3908 | 24 |
| H8'  | 9435 | 3746 | 4107 | 21 |
| H18A | 7925 | -940 | 7433 | 39 |
| H18B | 7561 | 229  | 7727 | 39 |
| H18C | 8073 | -385 | 8231 | 39 |
| H20A | 7234 | 3254 | 5247 | 30 |
| H20B | 7382 | 1786 | 5005 | 30 |
| H20C | 7163 | 2865 | 5284 | 30 |
| H20D | 7525 | 1832 | 4863 | 30 |
| H21A | 8041 | 4053 | 4712 | 74 |
| H21B | 7622 | 3336 | 4118 | 74 |
| H21C | 8173 | 2592 | 4459 | 74 |
| H22A | 7794 | 4561 | 5031 | 74 |
| H22B | 7531 | 3917 | 4294 | 74 |
| H22C | 8154 | 3535 | 4613 | 74 |

| <b>Table S14.</b> Atomic Occupancy for the Tetrabromo Chloro AIM ester <b>3</b> (MC221). |                  |  |             |                  |  |
|------------------------------------------------------------------------------------------|------------------|--|-------------|------------------|--|
| <b>Atom</b>                                                                              | <b>Occupancy</b> |  | <b>Atom</b> | <b>Occupancy</b> |  |
| O2                                                                                       | 0.657(13)        |  | O4          | 0.343(13)        |  |
| H20B                                                                                     | 0.73(3)          |  | H20C        | 0.27(3)          |  |
| C21'                                                                                     | 0.73(3)          |  | H21A        | 0.73(3)          |  |
| H21C                                                                                     | 0.73(3)          |  | C22'        | 0.27(3)          |  |
| H22B                                                                                     | 0.27(3)          |  | H22C        | 0.27(3)          |  |

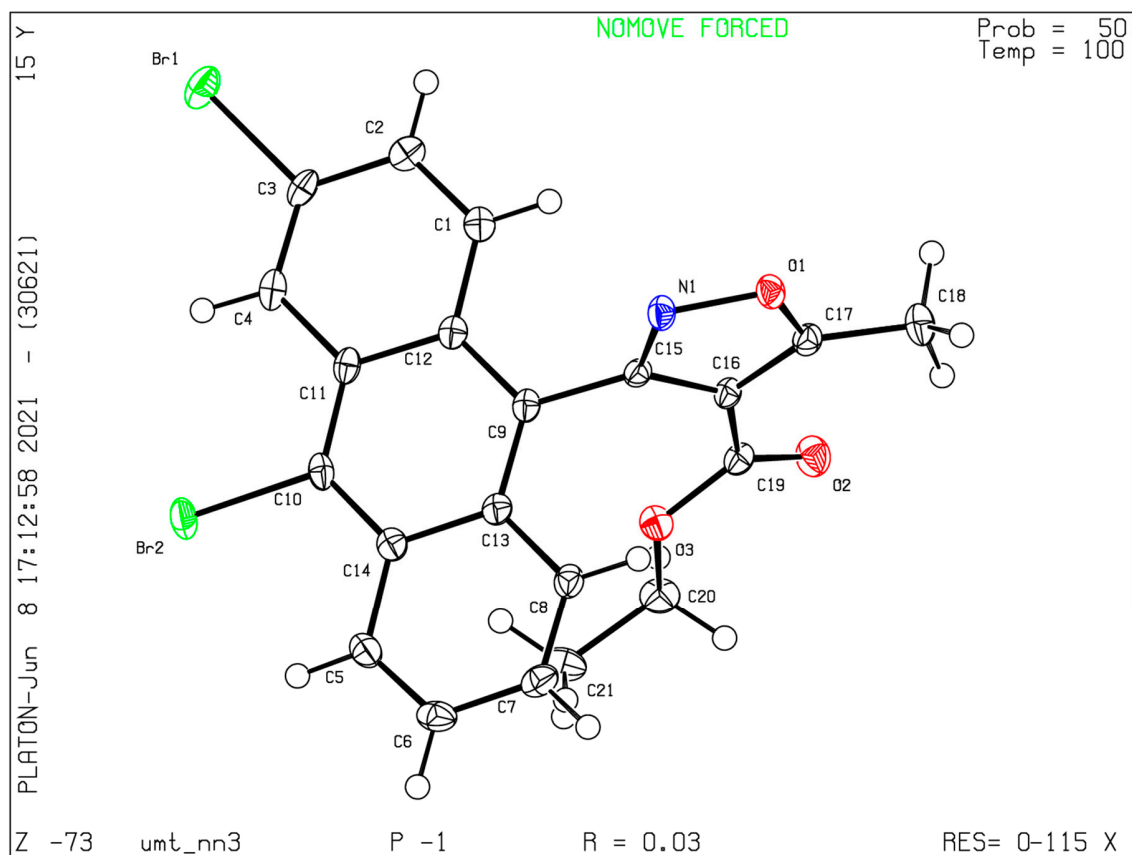

**Figure S9.** Numbering for dibromo ester **4** (MC219), umt-nn3.

**Table S15.** Fractional Atomic Coordinates ( $\times 10^4$ ) and Equivalent Isotropic Displacement Parameters ( $\text{\AA}^2 \times 10^3$ ) for dibromo ester **4**, (MC219), umt-nn3.  $U_{\text{eq}}$  is defined as 1/3 of the trace of the orthogonalised  $U_{\text{H}}$  tensor.

| Atom | <i>x</i>  | <i>y</i>  | <i>z</i>   | <i>U</i> (eq) |
|------|-----------|-----------|------------|---------------|
| Br2  | 2104.5(3) | 3136.3(3) | -167.5(3)  | 24.31(9)      |
| Br1  | 7395.4(4) | 430.8(3)  | -397.9(3)  | 25.07(9)      |
| O1   | 10863(2)  | 8859(2)   | 5025.2(18) | 17.3(4)       |
| O3   | 5840(2)   | 6993(2)   | 5399.8(18) | 18.1(4)       |
| O2   | 7854(3)   | 7746(2)   | 7219.9(19) | 23.9(4)       |
| N1   | 9681(3)   | 8018(2)   | 3824(2)    | 17.0(4)       |
| C11  | 5559(3)   | 4039(3)   | 1242(2)    | 15.3(5)       |
| C10  | 4062(3)   | 4482(3)   | 1077(2)    | 16.4(5)       |
| C15  | 8352(3)   | 7443(3)   | 4071(2)    | 13.8(5)       |

| Atom | <i>x</i> | <i>y</i> | <i>z</i> | U(eq)   |
|------|----------|----------|----------|---------|
| C2   | 8640(4)  | 3243(3)  | 1650(3)  | 19.6(5) |
| C9   | 6890(3)  | 6433(3)  | 2989(2)  | 14.5(5) |
| C14  | 3948(3)  | 5881(3)  | 1781(2)  | 16.2(5) |
| C12  | 7005(3)  | 5045(3)  | 2232(2)  | 14.7(5) |
| C16  | 8595(3)  | 7873(3)  | 5411(2)  | 14.7(5) |
| C8   | 5342(3)  | 8321(3)  | 3446(2)  | 17.7(5) |
| C13  | 5418(3)  | 6880(3)  | 2752(2)  | 15.0(5) |
| C3   | 7196(4)  | 2273(3)  | 675(3)   | 18.0(5) |
| C6   | 2442(4)  | 7751(3)  | 2273(3)  | 21.5(6) |
| C19  | 7431(3)  | 7539(3)  | 6127(2)  | 16.3(5) |
| C4   | 5705(4)  | 2633(3)  | 466(2)   | 18.5(5) |
| C1   | 8533(3)  | 4589(3)  | 2404(3)  | 17.6(5) |
| C5   | 2455(3)  | 6368(3)  | 1589(3)  | 19.6(5) |
| C7   | 3909(4)  | 8750(3)  | 3206(3)  | 21.2(6) |
| C18  | 11267(4) | 9549(3)  | 7263(3)  | 22.8(6) |
| C17  | 10190(3) | 8747(3)  | 5944(3)  | 16.4(5) |
| C21  | 2873(4)  | 6209(3)  | 5047(3)  | 24.7(6) |
| C20  | 4546(3)  | 6678(3)  | 6011(3)  | 21.9(6) |

**Table S16.** Anisotropic Displacement Parameters ( $\text{\AA}^2 \times 10^3$ ) for dibromo ester **4**, (MC219), umt-nn3. The Anisotropic displacement factor exponent takes the form:  $-2\pi^2[h^2a^{*2}U_{11}+2hka^*b^*U_{12}+\dots]$ .

| Atom | U <sub>11</sub> | U <sub>22</sub> | U <sub>33</sub> | U <sub>23</sub> | U <sub>13</sub> | U <sub>12</sub> |
|------|-----------------|-----------------|-----------------|-----------------|-----------------|-----------------|
| Br2  | 19.32(14)       | 23.23(15)       | 17.70(14)       | 2.39(11)        | -2.55(10)       | -1.92(11)       |
| Br1  | 38.43(18)       | 15.86(14)       | 19.02(15)       | 5.24(11)        | 6.84(12)        | 9.50(12)        |
| O1   | 14.5(9)         | 15.4(9)         | 17.2(9)         | 5.0(7)          | 2.4(7)          | -0.9(7)         |
| O3   | 15.8(9)         | 22.4(10)        | 16.9(9)         | 10.3(8)         | 6.0(7)          | 1.4(7)          |
| O2   | 24.2(10)        | 29.4(11)        | 16.9(10)        | 10.5(9)         | 4.6(8)          | 3.9(8)          |
| N1   | 16.1(10)        | 15.9(11)        | 14.3(10)        | 4.1(9)          | 3.1(8)          | -0.6(8)         |
| C11  | 20.0(12)        | 14.0(12)        | 10.5(11)        | 5.4(10)         | 4.1(9)          | 0.3(10)         |
| C10  | 16.2(12)        | 18.2(12)        | 10.7(11)        | 5.5(10)         | 1.2(9)          | -1.8(10)        |
| C15  | 14.4(11)        | 11.5(11)        | 14.0(12)        | 4.1(10)         | 4.5(9)          | 2.8(9)          |
| C2   | 23.5(13)        | 18.1(13)        | 20.1(13)        | 9.9(11)         | 8.2(11)         | 6.7(11)         |
| C9   | 15.3(11)        | 15.1(12)        | 11.6(11)        | 5.6(10)         | 4.8(9)          | 0.0(9)          |
| C14  | 15.9(12)        | 20.2(13)        | 13.1(12)        | 8.4(10)         | 4.9(10)         | 2.6(10)         |

| Atom | U <sub>11</sub> | U <sub>22</sub> | U <sub>33</sub> | U <sub>23</sub> | U <sub>13</sub> | U <sub>12</sub> |
|------|-----------------|-----------------|-----------------|-----------------|-----------------|-----------------|
| C12  | 16.5(12)        | 14.9(12)        | 12.9(11)        | 6.8(10)         | 5.0(9)          | 1.1(9)          |
| C16  | 16.2(12)        | 11.3(11)        | 13.9(12)        | 3.7(9)          | 3.2(9)          | 2.2(9)          |
| C8   | 17.6(12)        | 18.5(13)        | 14.3(12)        | 5.2(10)         | 5.1(10)         | 2.1(10)         |
| C13  | 15.4(12)        | 18.0(12)        | 12.3(11)        | 7.0(10)         | 6.4(9)          | 2.4(10)         |
| C3   | 28.5(14)        | 11.1(11)        | 14.4(12)        | 4.7(10)         | 7.9(11)         | 5.3(10)         |
| C6   | 18.7(13)        | 32.0(16)        | 21.0(13)        | 15.2(12)        | 9.8(11)         | 11.3(11)        |
| C19  | 18.9(12)        | 12.9(12)        | 15.8(12)        | 5.0(10)         | 5.4(10)         | 3.5(10)         |
| C4   | 24.3(13)        | 14.4(12)        | 12.6(12)        | 4.8(10)         | 2.6(10)         | -0.9(10)        |
| C1   | 17.9(12)        | 17.9(13)        | 16.3(12)        | 7.9(10)         | 4.4(10)         | 1.9(10)         |
| C5   | 15.1(12)        | 26.6(14)        | 16.2(12)        | 9.8(11)         | 3.1(10)         | 3.2(11)         |
| C7   | 25.7(14)        | 22.5(14)        | 18.8(13)        | 9.1(11)         | 10.1(11)        | 11.0(11)        |
| C18  | 20.6(13)        | 20.1(14)        | 19.6(14)        | 6.0(11)         | -0.3(11)        | -2.7(11)        |
| C17  | 18.5(12)        | 12.6(11)        | 16.2(12)        | 5.0(10)         | 3.5(10)         | 3.6(10)         |
| C21  | 17.5(13)        | 30.7(16)        | 32.6(16)        | 18.7(14)        | 10.3(12)        | 7.5(11)         |
| C20  | 19.7(13)        | 28.7(15)        | 22.6(14)        | 14.5(12)        | 12.0(11)        | 5.0(11)         |

**Table S17.** Bond Lengths for dibromo ester **4**, (MC219).

| Atom | Atom | Length/Å | Atom | Atom | Length/Å |
|------|------|----------|------|------|----------|
| Br2  | C10  | 1.900(3) | C2   | C1   | 1.367(4) |
| Br1  | C3   | 1.899(3) | C9   | C12  | 1.407(4) |
| O1   | N1   | 1.421(3) | C9   | C13  | 1.402(4) |
| O1   | C17  | 1.344(3) | C14  | C13  | 1.438(4) |
| O3   | C19  | 1.339(3) | C14  | C5   | 1.431(4) |
| O3   | C20  | 1.459(3) | C12  | C1   | 1.436(4) |
| O2   | C19  | 1.208(3) | C16  | C19  | 1.479(4) |
| N1   | C15  | 1.308(3) | C16  | C17  | 1.365(4) |
| C11  | C10  | 1.404(4) | C8   | C13  | 1.429(4) |
| C11  | C12  | 1.437(3) | C8   | C7   | 1.363(4) |
| C11  | C4   | 1.436(4) | C3   | C4   | 1.361(4) |
| C10  | C14  | 1.404(4) | C6   | C5   | 1.360(4) |
| C15  | C9   | 1.490(3) | C6   | C7   | 1.421(4) |
| C15  | C16  | 1.437(3) | C18  | C17  | 1.481(4) |
| C2   | C3   | 1.420(4) | C21  | C20  | 1.509(4) |

**Table S18.** Bond Angles for dibromo ester **4**, (MC219), umt-nn3.

| Atom | Atom | Atom | Angle/°    | Atom | Atom | Atom | Angle/°  |
|------|------|------|------------|------|------|------|----------|
| C17  | O1   | N1   | 109.41(19) | C15  | C16  | C19  | 130.5(2) |
| C19  | O3   | C20  | 116.2(2)   | C17  | C16  | C15  | 104.3(2) |
| C15  | N1   | O1   | 105.3(2)   | C17  | C16  | C19  | 125.1(2) |
| C10  | C11  | C12  | 118.2(2)   | C7   | C8   | C13  | 121.1(3) |
| C10  | C11  | C4   | 122.9(2)   | C9   | C13  | C14  | 119.9(2) |
| C4   | C11  | C12  | 118.9(2)   | C9   | C13  | C8   | 121.5(2) |
| C11  | C10  | Br2  | 118.7(2)   | C8   | C13  | C14  | 118.6(2) |
| C14  | C10  | Br2  | 118.3(2)   | C2   | C3   | Br1  | 118.2(2) |
| C14  | C10  | C11  | 123.0(2)   | C4   | C3   | Br1  | 119.5(2) |
| N1   | C15  | C9   | 118.8(2)   | C4   | C3   | C2   | 122.3(2) |
| N1   | C15  | C16  | 111.6(2)   | C5   | C6   | C7   | 120.8(3) |
| C16  | C15  | C9   | 129.6(2)   | O3   | C19  | C16  | 110.6(2) |
| C1   | C2   | C3   | 118.9(3)   | O2   | C19  | O3   | 124.6(2) |
| C12  | C9   | C15  | 119.4(2)   | O2   | C19  | C16  | 124.8(2) |
| C13  | C9   | C15  | 119.4(2)   | C3   | C4   | C11  | 119.9(2) |
| C13  | C9   | C12  | 121.2(2)   | C2   | C1   | C12  | 121.8(3) |
| C10  | C14  | C13  | 117.9(2)   | C6   | C5   | C14  | 121.0(3) |
| C10  | C14  | C5   | 123.8(2)   | C8   | C7   | C6   | 120.1(3) |
| C5   | C14  | C13  | 118.3(2)   | O1   | C17  | C16  | 109.4(2) |
| C9   | C12  | C11  | 119.6(2)   | O1   | C17  | C18  | 116.6(2) |
| C9   | C12  | C1   | 122.3(2)   | C16  | C17  | C18  | 134.0(3) |
| C1   | C12  | C11  | 118.2(2)   | O3   | C20  | C21  | 106.0(2) |

**Table S19.** Torsion Angles for dibromo ester **4**, (MC219), umt\_nn3.

| A   | B   | C   | D   | Angle/°     | A   | B   | C   | D   | Angle/°     |
|-----|-----|-----|-----|-------------|-----|-----|-----|-----|-------------|
| Br2 | C10 | C14 | C13 | 177.87(18)  | C12 | C11 | C10 | Br2 | -176.75(18) |
| Br2 | C10 | C14 | C5  | -2.0(3)     | C12 | C11 | C10 | C14 | 4.0(4)      |
| Br1 | C3  | C4  | C11 | -177.77(19) | C12 | C11 | C4  | C3  | 0.0(4)      |
| O1  | N1  | C15 | C9  | -177.3(2)   | C12 | C9  | C13 | C14 | 4.8(4)      |
| O1  | N1  | C15 | C16 | 0.2(3)      | C12 | C9  | C13 | C8  | -174.6(2)   |
| N1  | O1  | C17 | C16 | -0.5(3)     | C16 | C15 | C9  | C12 | -101.9(3)   |
| N1  | O1  | C17 | C18 | 179.3(2)    | C16 | C15 | C9  | C13 | 77.6(4)     |
| N1  | C15 | C9  | C12 | 75.1(3)     | C13 | C9  | C12 | C11 | -3.6(4)     |

**Table S19.** Torsion Angles for dibromo ester **4**, (MC219), umt\_nn3.

| A   | B   | C   | D   | Angle/°   | A   | B   | C   | D   | Angle/°   |
|-----|-----|-----|-----|-----------|-----|-----|-----|-----|-----------|
| N1  | C15 | C9  | C13 | -105.4(3) | C13 | C9  | C12 | C1  | 176.0(2)  |
| N1  | C15 | C16 | C19 | 177.4(3)  | C13 | C14 | C5  | C6  | 2.4(4)    |
| N1  | C15 | C16 | C17 | -0.5(3)   | C13 | C8  | C7  | C6  | 1.5(4)    |
| C11 | C10 | C14 | C13 | -2.9(4)   | C3  | C2  | C1  | C12 | -0.2(4)   |
| C11 | C10 | C14 | C5  | 177.2(2)  | C19 | O3  | C20 | C21 | 175.0(2)  |
| C11 | C12 | C1  | C2  | 0.6(4)    | C19 | C16 | C17 | O1  | -177.5(2) |
| C10 | C11 | C12 | C9  | -0.7(4)   | C19 | C16 | C17 | C18 | 2.7(5)    |
| C10 | C11 | C12 | C1  | 179.7(2)  | C4  | C11 | C10 | Br2 | 3.4(3)    |
| C10 | C11 | C4  | C3  | 179.9(3)  | C4  | C11 | C10 | C14 | -175.9(2) |
| C10 | C14 | C13 | C9  | -1.5(4)   | C4  | C11 | C12 | C9  | 179.2(2)  |
| C10 | C14 | C13 | C8  | 177.8(2)  | C4  | C11 | C12 | C1  | -0.4(4)   |
| C10 | C14 | C5  | C6  | -177.8(3) | C1  | C2  | C3  | Br1 | 177.9(2)  |
| C15 | C9  | C12 | C11 | 175.9(2)  | C1  | C2  | C3  | C4  | -0.3(4)   |
| C15 | C9  | C12 | C1  | -4.5(4)   | C5  | C14 | C13 | C9  | 178.4(2)  |
| C15 | C9  | C13 | C14 | -174.7(2) | C5  | C14 | C13 | C8  | -2.3(4)   |
| C15 | C9  | C13 | C8  | 5.9(4)    | C5  | C6  | C7  | C8  | -1.5(4)   |
| C15 | C16 | C19 | O3  | -14.7(4)  | C7  | C8  | C13 | C9  | 179.7(2)  |
| C15 | C16 | C19 | O2  | 166.2(3)  | C7  | C8  | C13 | C14 | 0.4(4)    |
| C15 | C16 | C17 | O1  | 0.6(3)    | C7  | C6  | C5  | C14 | -0.5(4)   |
| C15 | C16 | C17 | C18 | -179.3(3) | C17 | O1  | N1  | C15 | 0.2(3)    |
| C2  | C3  | C4  | C11 | 0.4(4)    | C17 | C16 | C19 | O3  | 162.9(2)  |
| C9  | C15 | C16 | C19 | -5.4(5)   | C17 | C16 | C19 | O2  | -16.3(4)  |
| C9  | C15 | C16 | C17 | 176.7(3)  | C20 | O3  | C19 | O2  | 1.9(4)    |
| C9  | C12 | C1  | C2  | -179.0(2) | C20 | O3  | C19 | C16 | -177.2(2) |

**Table S20.** Hydrogen Atom Coordinates ( $\text{\AA} \times 10^4$ ) and Isotropic Displacement Parameters ( $\text{\AA}^2 \times 10^3$ ) for dibromo ester **4**, (MC219), umt-nn3.

| Atom | <i>x</i> | <i>y</i> | <i>z</i> | U(eq) |
|------|----------|----------|----------|-------|
| H2   | 9664.29  | 2962.76  | 1776.74  | 23    |
| H8   | 6306.99  | 8992.58  | 4085.96  | 21    |
| H6   | 1439.72  | 8052.71  | 2125.97  | 26    |
| H4   | 4761.33  | 1953.6   | -192.53  | 22    |
| H1   | 9496.22  | 5239.76  | 3059.64  | 21    |

| <b>Table S20.</b> Hydrogen Atom Coordinates ( $\text{\AA}\times 10^4$ ) and Isotropic Displacement Parameters ( $\text{\AA}^2\times 10^3$ ) for dibromo ester <b>4</b> , (MC219), umt-nn3. |          |          |          |              |
|--------------------------------------------------------------------------------------------------------------------------------------------------------------------------------------------|----------|----------|----------|--------------|
| <b>Atom</b>                                                                                                                                                                                | <b>x</b> | <b>y</b> | <b>z</b> | <b>U(eq)</b> |
| H5                                                                                                                                                                                         | 1458.68  | 5714.96  | 974.3    | 24           |
| H7                                                                                                                                                                                         | 3891.4   | 9717.44  | 3663.19  | 25           |
| H18A                                                                                                                                                                                       | 12161.48 | 9074.39  | 7377.75  | 34           |
| H18B                                                                                                                                                                                       | 10573.14 | 9582.8   | 7862.3   | 34           |
| H18C                                                                                                                                                                                       | 11780.5  | 10520.54 | 7420.83  | 34           |
| H21A                                                                                                                                                                                       | 2846.59  | 5343.73  | 4293.29  | 37           |
| H21B                                                                                                                                                                                       | 2734.07  | 6965.69  | 4800.08  | 37           |
| H21C                                                                                                                                                                                       | 1949.84  | 6013.29  | 5419.96  | 37           |
| H20A                                                                                                                                                                                       | 4580.39  | 7535.31  | 6789.99  | 26           |
| H20B                                                                                                                                                                                       | 4725.92  | 5911.03  | 6247.04  | 26           |

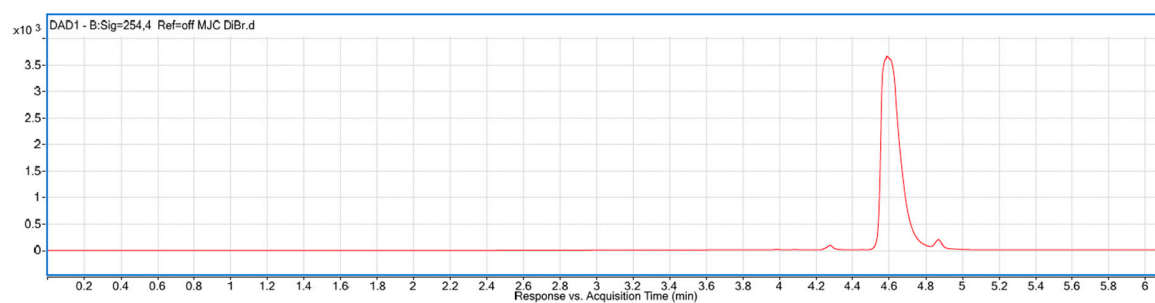

## MS Spectra

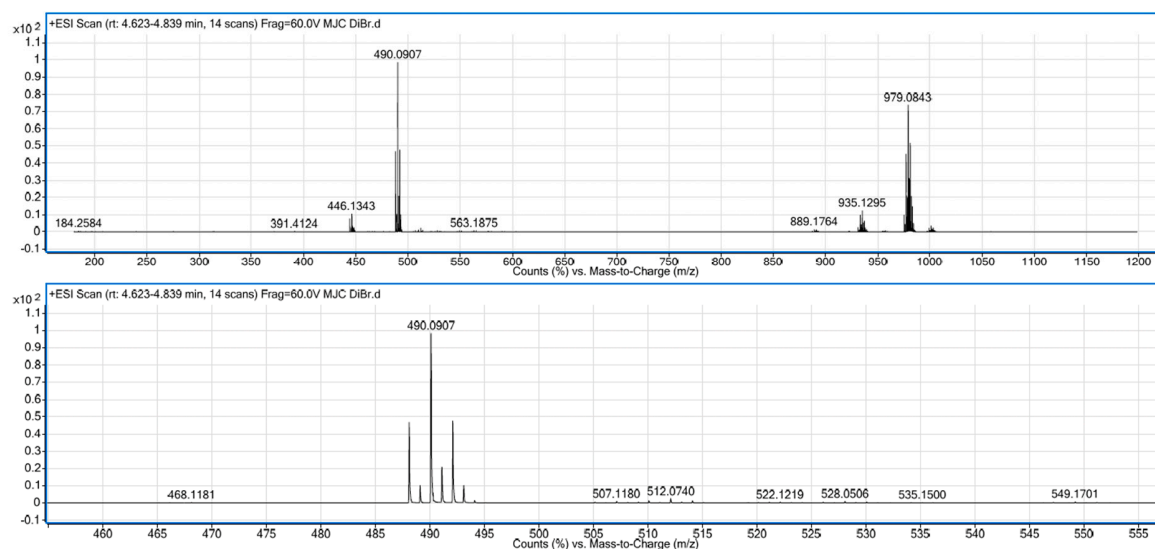

Figure S10. HPLC-MS for dibromo ester **4**.
